# Supplementary material for: A Network Pharmacology Approach to Explore the Mechanism of HuangZhi YiShen Capsule for Treatment of Diabetic Kidney Disease
Source: PubMed Central journal article supplement — J Transl Int Med. 2021 Jun 18;9(2):98–113. doi: 10.2478/jtim-2021-0020 (PMC8386324; doi:10.2478/jtim-2021-0020), 2021-06-18
Supplement: jtim-09-098_sm.pdf [file jtim-09-098_sm.pdf]

# Supplementary Materials

**Supplementary Table S1: Basic information of HZYS compound ingredients**

| Herb name              | ID                 | Mol ID    | Molecule name                                                                                                                                                                           | OB (%)             | DL   |
|------------------------|--------------------|-----------|-----------------------------------------------------------------------------------------------------------------------------------------------------------------------------------------|--------------------|------|
| Astragalus Mongholicus | HQ1                | MOL000033 | (3S,8S,9S,10R,13R,14S,17R)-10,13-dimethyl-17-[(2R,5S)-5-propan-2-yloctan-2-yl]-2,3,4,7,8,9,11,12,14,15,16,17-dodecahydro-1H-cyclopenta[a]phenanthren-3-ol                               | 36.23              | 0.78 |
|                        | HQ2                | MOL000239 | Jaranol                                                                                                                                                                                 | 50.83              | 0.29 |
|                        | HQ3                | MOL000296 | hederagenin                                                                                                                                                                             | 36.91              | 0.75 |
|                        | HQ4                | MOL000371 | 3,9-di-O-methylnissolin                                                                                                                                                                 | 53.74              | 0.48 |
|                        | HQ5                | MOL000378 | 7-O-methylisomucronulatol                                                                                                                                                               | 74.69              | 0.3  |
|                        | HQ6                | MOL000379 | 9,10-dimethoxypterocarpan-3-O-β-D-glucoside                                                                                                                                             | 36.74              | 0.92 |
|                        | HQ7                | MOL000380 | (6aR,11aR)-9,10-dimethoxy-6a,11a-dihydro-6H-benzofurano[3,2-c]chromen-3-ol                                                                                                              | 64.26              | 0.42 |
|                        | HQ8                | MOL000387 | Bifendate                                                                                                                                                                               | 31.1               | 0.67 |
|                        | HQ9                | MOL000392 | formononetin                                                                                                                                                                            | 69.67              | 0.21 |
|                        | HQ10               | MOL000417 | Calycosin                                                                                                                                                                               | 47.75              | 0.24 |
|                        | HQ11               | MOL000433 | FA                                                                                                                                                                                      | 68.96              | 0.71 |
|                        | HQ12               | MOL000442 | 1,7-Dihydroxy-3,9-dimethoxy pterocarpene                                                                                                                                                | 39.05              | 0.48 |
|                        | HQ13               |           | 2-(Chloromethyl)-4-(4-Nitrophenyl)-1,3-Thiazole                                                                                                                                         |                    |      |
|                        | HQ14               |           | 5,7-dihydroxy-2-(4-hydroxy-3-methoxyphenyl)-3-[(2S,3R,4S,5S,6R)-3,4,5-trihydroxy-6-[[[(2R,3R,4S,5S,6R)-3,4,5-trihydroxy-6-(hydroxymethyl)oxan-2-yl]oxymethyl]oxan-2-yl]oxychromen-4-one |                    |      |
| Radix Scrophulariae    | A1                 | MOL000098 | quercetin                                                                                                                                                                               | 46.43              | 0.28 |
|                        | A2                 | MOL000354 | isorhamnetin                                                                                                                                                                            | 49.6               | 0.31 |
|                        | A3                 | MOL000422 | kaempferol                                                                                                                                                                              | 41.88              | 0.24 |
|                        | A4                 | MOL000211 | Mairin                                                                                                                                                                                  | 55.38              | 0.78 |
|                        | XS1                | MOL002222 | sugiol                                                                                                                                                                                  | 36.11              | 0.28 |
|                        | XS2                | MOL007658 | 14-deoxy-12(R)-sulfoandrographolide                                                                                                                                                     | 62.57              | 0.42 |
|                        | XS3                | MOL007662 | harpagoside_qt                                                                                                                                                                          | 122.87             | 0.32 |
|                        | B1                 | MOL000358 | beta-sitosterol                                                                                                                                                                         | 36.91              | 0.75 |
|                        | E                  | MOL000359 | sitosterol                                                                                                                                                                              | 36.91              | 0.75 |
|                        | Glehnia littoralis | BSS1      | MOL001939                                                                                                                                                                               | Alloisoimperatorin | 34.8 |
| BSS2                   |                    | MOL001941 | Ammidin                                                                                                                                                                                 | 34.55              | 0.22 |
| BSS3                   |                    | MOL001942 | isoimperatorin                                                                                                                                                                          | 45.46              | 0.23 |
| BSS4                   |                    | MOL001951 | Bergaptin                                                                                                                                                                               | 41.73              | 0.42 |
| BSS5                   |                    | MOL001956 | Cnidilin                                                                                                                                                                                | 32.69              | 0.28 |
| Pseudo Ginseng         | A1                 | MOL000098 | quercetin                                                                                                                                                                               | 46.43              | 0.28 |
|                        | B1                 | MOL000358 | beta-sitosterol                                                                                                                                                                         | 36.91              | 0.75 |
|                        | B2                 | MOL000449 | Stigmasterol                                                                                                                                                                            | 43.83              | 0.76 |
|                        | SQ1                | MOL001792 | DFV                                                                                                                                                                                     | 32.76              | 0.18 |
|                        | SQ2                | MOL002879 | Diop                                                                                                                                                                                    | 43.59              | 0.39 |
|                        | SQ3                | MOL005344 | ginsenoside rh2                                                                                                                                                                         | 36.32              | 0.56 |
|                        | A1                 | MOL000098 | quercetin                                                                                                                                                                               | 46.43              | 0.28 |
|                        | C                  | MOL001494 | Mandenol                                                                                                                                                                                | 42                 | 0.19 |
|                        | B1                 | MOL000358 | beta-sitosterol                                                                                                                                                                         | 36.91              | 0.75 |
|                        | B2                 | MOL000449 | Stigmasterol                                                                                                                                                                            | 43.83              | 0.76 |
| Motherwort             | YMC1               | MOL001418 | galeopsin                                                                                                                                                                               | 61.02              | 0.38 |
|                        | YMC2               | MOL001420 | ZINC04073977                                                                                                                                                                            | 38                 | 0.76 |

**Supplementary Table S1: Basic information of HZYS compound ingredients**

| Herb name                          | ID                         | Mol ID                                          | Molecule name                   | OB (%)    | DL    |
|------------------------------------|----------------------------|-------------------------------------------------|---------------------------------|-----------|-------|
| Radix<br>Achyranthis<br>Bidentatae | YMC3                       | MOL001421                                       | preleoheterin                   | 85.97     | 0.33  |
|                                    | YMC4                       | MOL001422                                       | iso-preleoheterin               | 66.29     | 0.33  |
|                                    | YMC5                       | MOL001439                                       | arachidonic acid                | 45.57     | 0.2   |
|                                    | A1                         | MOL000098                                       | quercetin                       | 46.43     | 0.28  |
|                                    | A2                         | MOL000354                                       | isorhamnetin                    | 49.6      | 0.31  |
|                                    | A3                         | MOL000422                                       | iso-preleoheterin               | 66.29     | 0.33  |
|                                    | NX1                        | MOL000085                                       | beta-daucosterol_qt             | 36.91     | 0.75  |
|                                    | NX2                        | MOL000173                                       | wogonin                         | 30.68     | 0.23  |
|                                    | NX3                        | MOL000785                                       | palmatine                       | 64.6      | 0.65  |
|                                    | NX4                        | MOL001006                                       | poriferasta-7,22E-dien-3beta-ol | 42.98     | 0.76  |
|                                    | NX5                        | MOL001454                                       | berberine                       | 36.86     | 0.78  |
|                                    | Barbary<br>Wolfberry Fruit | NX6                                             | MOL001458                       | coptisine | 30.67 |
| NX7                                |                            | MOL002643                                       | delta 7-stigmastenol            | 37.42     | 0.75  |
| NX8                                |                            | MOL002714                                       | baicalein                       | 33.52     | 0.21  |
| NX9                                |                            | MOL002897                                       | epiberberine                    | 43.09     | 0.78  |
| NX10                               |                            | MOL003847                                       | Inophyllum E                    | 38.81     | 0.85  |
| NX11                               |                            | MOL004355                                       | Spinasterol                     | 42.98     | 0.76  |
| NX12                               |                            | MOL012461                                       | 28-norolean-17-en-3-ol          | 35.93     | 0.78  |
| A1                                 |                            | MOL000098                                       | quercetin                       | 46.43     | 0.28  |
| A3                                 |                            | MOL000422                                       | kaempferol                      | 41.88     | 0.24  |
| B1                                 |                            | MOL000358                                       | beta-sitosterol                 | 36.91     | 0.75  |
| B2                                 |                            | MOL000449                                       | Stigmasterol                    | 43.83     | 0.76  |
| GQZ1                               |                            | MOL000953                                       | CLR                             | 37.87     | 0.68  |
| GQZ2                               |                            | MOL001323                                       | Sitosterol alpha1               | 43.28     | 0.78  |
| GQZ3                               |                            | MOL001495                                       | Ethyl linolenate                | 46.1      | 0.2   |
| GQZ4                               |                            | MOL001979                                       | LAN                             | 42.12     | 0.75  |
| GQZ5                               |                            | MOL003578                                       | Cycloartenol                    | 38.69     | 0.78  |
| GQZ6                               |                            | MOL005406                                       | atropine                        | 45.97     | 0.19  |
| GQZ7                               |                            | MOL005438                                       | campesterol                     | 37.58     | 0.71  |
| GQZ8                               |                            | MOL006209                                       | cyanin                          | 47.42     | 0.76  |
| GQZ9                               |                            | MOL007449                                       | 24-methylidenelophenol          | 44.19     | 0.75  |
| GQZ10                              |                            | MOL008173                                       | daucosterol_qt                  | 36.91     | 0.75  |
| GQZ11                              |                            | MOL008400                                       | glycitein                       | 50.48     | 0.24  |
| GQZ12                              | MOL009604                  | 14b-pregnane                                    | 34.78                           | 0.34      |       |
| GQZ13                              | MOL009617                  | 24-ethylcholest-22-enol                         | 37.09                           | 0.75      |       |
| GQZ14                              | MOL009618                  | 24-ethylcholesta-5,22-dienol                    | 43.83                           | 0.76      |       |
| GQZ15                              | MOL009620                  | 24-methyl-31-norlanost-9(11)-enol               | 38                              | 0.75      |       |
| GQZ16                              | MOL009621                  | 24-methylenelanost-8-enol                       | 42.37                           | 0.77      |       |
| GQZ17                              | MOL009622                  | Fucoesterol                                     | 43.78                           | 0.76      |       |
| GQZ18                              | MOL009633                  | 31-norlanost-9(11)-enol                         | 38.35                           | 0.72      |       |
| GQZ19                              | MOL009634                  | 31-norlanosterol                                | 42.2                            | 0.73      |       |
| GQZ20                              | MOL009635                  | 4,24-methyllophenol                             | 37.83                           | 0.75      |       |
| GQZ21                              | MOL009639                  | Lophenol                                        | 38.13                           | 0.71      |       |
| GQZ22                              | MOL009640                  | 4alpha,14alpha,24-trimethylcholesta-8,24-dienol | 38.91                           | 0.76      |       |

**Supplementary Table S1: Basic information of HZYS compound ingredients**

| Herb name         | ID    | Mol ID    | Molecule name                                      | OB (%) | DL   |
|-------------------|-------|-----------|----------------------------------------------------|--------|------|
|                   | GQZ23 | MOL009641 | 4alpha,24-dimethylcholesta-7,24-dienol             | 42.65  | 0.75 |
|                   | GQZ24 | MOL009642 | 4alpha-methyl-24-ethylcholesta-7,24-dienol         | 42.3   | 0.78 |
|                   | GQZ25 | MOL009644 | 6-Fluoroindole-7-Dehydrocholesterol                | 43.73  | 0.72 |
|                   | GQZ26 | MOL009646 | 7-O-Methyluteolin-6-C-beta-glucoside_qt            | 40.77  | 0.3  |
|                   | GQZ27 | MOL009650 | Atropine                                           | 42.16  | 0.19 |
|                   | GQZ28 | MOL009656 | (E,E)-1-ethyl octadeca-3,13-dienoate               | 42     | 0.19 |
|                   | GQZ29 | MOL009677 | lanost-8-en-3beta-ol                               | 34.23  | 0.74 |
|                   | GQZ30 | MOL009678 | lanost-8-enol                                      | 34.23  | 0.74 |
|                   | GQZ31 | MOL009681 | Obtusifoliol                                       | 42.55  | 0.76 |
|                   | A1    | MOL000098 | quercetin                                          | 46.43  | 0.28 |
|                   | B1    | MOL000358 | beta-sitosterol                                    | 36.91  | 0.75 |
|                   | B2    | MOL000449 | Stigmasterol                                       | 43.83  | 0.76 |
|                   | C     | MOL001494 | Mandenol                                           | 42     | 0.19 |
| Chinese yam       | SY1   | MOL000322 | Kadsurenone                                        | 54.72  | 0.38 |
|                   | SY2   | MOL000546 | diosgenin                                          | 80.88  | 0.81 |
|                   | SY3   | MOL001559 | piperlonguminine                                   | 30.71  | 0.18 |
|                   | SY4   | MOL001736 | (-)-taxifolin                                      | 60.51  | 0.27 |
|                   | SY5   | MOL005430 | hancinone C                                        | 59.05  | 0.39 |
|                   | SY6   | MOL005435 | 24-Methylcholest-5-enyl-3beta-O-glucopyranoside_qt | 37.58  | 0.72 |
|                   | SY7   | MOL005440 | Isofucosterol                                      | 43.78  | 0.76 |
|                   | SY8   | MOL005458 | Dioscoreside C_qt                                  | 36.38  | 0.87 |
|                   | SY9   | MOL005465 | AIDS180907                                         | 45.33  | 0.77 |
|                   | B2    | MOL000449 | Stigmasterol                                       | 43.83  | 0.76 |
|                   | D1    | MOL000953 | CLR                                                | 37.87  | 0.68 |
|                   | D2    | MOL005438 | campesterol                                        | 37.58  | 0.71 |
| Coix Seed         | YYR1  | MOL000359 | sitosterol                                         | 36.91  | 0.75 |
|                   | YYR2  | MOL008121 | 2-Monoolein                                        | 34.23  | 0.29 |
|                   | B2    | MOL000449 | Stigmasterol                                       | 43.83  | 0.76 |
|                   | C     | MOL001494 | Mandenol                                           | 42     | 0.19 |
|                   | D1    | MOL000953 | CLR                                                | 37.87  | 0.68 |
|                   | D3    | MOL001323 | Sitosterol alpha1                                  | 43.28  | 0.78 |
| Eclipta prostrata | MHL1  | MOL000006 | luteolin                                           | 36.16  | 0.25 |
|                   | MHL2  | MOL001689 | acacetin                                           | 34.97  | 0.24 |
|                   | MHL3  | MOL002975 | butin                                              | 69.94  | 0.21 |
|                   | MHL4  | MOL003389 | 3'-O-Methylorobol                                  | 57.41  | 0.27 |
|                   | MHL5  | MOL003398 | Pratensein                                         | 39.06  | 0.28 |
|                   | MHL6  | MOL003402 | demethylwedelolactone                              | 72.13  | 0.43 |
|                   | MHL7  | MOL003404 | wedelolactone                                      | 49.6   | 0.48 |
|                   | A1    | MOL000098 | quercetin                                          | 46.43  | 0.28 |
| Eucommia          | DZ1   | MOL000073 | ent-Epicatechin                                    | 48.96  | 0.24 |
|                   | DZ2   | MOL000443 | Erythraline                                        | 49.18  | 0.55 |
|                   | DZ3   | MOL002058 | 40957-99-1                                         | 57.2   | 0.62 |
|                   | DZ4   | MOL002773 | beta-carotene                                      | 37.18  | 0.58 |
|                   | DZ5   | MOL004367 | olivil                                             | 62.23  | 0.41 |
|                   | DZ6   | MOL006709 | AIDS214634                                         | 92.43  | 0.55 |

**Supplementary Table S1: Basic information of HZYS compound ingredients**

| Herb name     | ID   | Mol ID    | Molecule name                                                                                             | OB (%) | DL   |
|---------------|------|-----------|-----------------------------------------------------------------------------------------------------------|--------|------|
|               | DZ7  | MOL007059 | 3-beta-Hydroxymethyllenetanshiquinone                                                                     | 32.16  | 0.41 |
|               | DZ8  | MOL007563 | Yangambin                                                                                                 | 57.53  | 0.81 |
|               | DZ9  | MOL008240 | (E)-3-[4-[(1R,2R)-2-hydroxy-2-(4-hydroxy-3-methoxy-phenyl)-1-methylol-ethoxy]-3-methoxy-phenyl]acrolein   | 56.32  | 0.36 |
|               | DZ10 | MOL009009 | (+)-medioresinol                                                                                          | 87.19  | 0.62 |
|               | DZ11 | MOL009015 | (-)-Tabernemontanine                                                                                      | 58.67  | 0.61 |
|               | DZ12 | MOL009027 | Cyclopamine                                                                                               | 55.42  | 0.82 |
|               | DZ13 | MOL009029 | Dehydrodiconiferyl alcohol 4,gamma'-di-O-beta-D-glucopyanoside<br>_qt                                     | 51.44  | 0.4  |
|               | DZ14 | MOL009031 | Cinchonan-9-al, 6'-methoxy-, (9R)-                                                                        | 68.22  | 0.4  |
|               | DZ15 | MOL009042 | Helenalin                                                                                                 | 77.01  | 0.19 |
|               | DZ16 | MOL009047 | (+)-Eudesmin                                                                                              | 33.29  | 0.62 |
|               | DZ17 | MOL009053 | 4-[(2S,3R)-5-[(E)-3-hydroxyprop-1-enyl]-7-methoxy-3-methylol-2,3-dihydrobenzofuran-2-yl]-2-methoxy-phenol | 50.76  | 0.39 |
|               | DZ18 | MOL009055 | hirsutin_qt                                                                                               | 49.81  | 0.37 |
|               | DZ19 | MOL009057 | liriodendrin_qt                                                                                           | 53.14  | 0.8  |
|               | DZ20 | MOL011604 | Syringetin                                                                                                | 36.82  | 0.37 |
|               | A1   | MOL000098 | quercetin                                                                                                 | 46.43  | 0.28 |
|               | A3   | MOL000422 | kaempferol                                                                                                | 41.88  | 0.24 |
|               | A4   | MOL000211 | Mairin                                                                                                    | 55.38  | 0.78 |
|               | B1   | MOL000358 | beta-sitosterol                                                                                           | 36.91  | 0.75 |
| Plantain seed | CQZ1 | MOL000359 | Dinatin                                                                                                   | 30.97  | 0.27 |
|               | CQZ2 | MOL001735 | Dinatin                                                                                                   | 30.97  | 0.27 |
|               | CQZ3 | MOL005869 | daucostero_qt                                                                                             | 36.91  | 0.75 |
|               | CQZ4 | MOL007813 | Dihydrotricetin                                                                                           | 58.12  | 0.28 |
|               | CQZ5 | MOL007819 | Hypolaetin                                                                                                | 33.24  | 0.28 |
|               | CQZ6 | MOL007835 | orobanchoside_qt                                                                                          | 55.99  | 0.82 |
|               | A1   | MOL000098 | quercetin                                                                                                 | 46.43  | 0.28 |
| Leech         | SZ1  |           | crocetin                                                                                                  |        |      |
|               | SZ2  |           | croomionidine                                                                                             |        |      |
|               | SZ3  |           | genipinic acid                                                                                            |        |      |
|               | SZ4  |           | palmitic acid                                                                                             |        |      |
|               | SZ5  |           | butanedioic acid                                                                                          |        |      |
|               | SZ6  |           | phenylalanine                                                                                             |        |      |
|               | SZ7  |           | L-methionine                                                                                              |        |      |
|               | SZ8  |           | L-glutamic acid                                                                                           |        |      |
|               | SZ9  |           | L-tyrosine                                                                                                |        |      |
|               | SZ10 |           | L-leucine                                                                                                 |        |      |
|               | SZ11 |           | proline                                                                                                   |        |      |
|               | SZ12 |           | L-tryptophan                                                                                              |        |      |
|               | SZ13 |           | L-aspartic acid                                                                                           |        |      |
|               | SZ14 |           | valine                                                                                                    |        |      |
|               | SZ15 |           | L-isoleucine                                                                                              |        |      |
|               | SZ16 |           | L-histidine                                                                                               |        |      |
|               | SZ17 |           | methyl ( Z ) -11-hexadecenoate                                                                            |        |      |

**Supplementary Table S1: Basic information of HZYS compound ingredients**

| Herb name           | ID    | Mol ID | Molecule name                                                                                                                                                                   | OB (%) | DL |
|---------------------|-------|--------|---------------------------------------------------------------------------------------------------------------------------------------------------------------------------------|--------|----|
|                     | SZ18  |        | methyl 14-methylpentadecanoate                                                                                                                                                  |        |    |
|                     | SZ19  |        | methyl 4-methyltetradecanoate                                                                                                                                                   |        |    |
|                     | SZ20  |        | methyl 12-methyltetradecanoate                                                                                                                                                  |        |    |
|                     | SZ21  |        | hirudinoidine a                                                                                                                                                                 |        |    |
|                     | SZ22  |        | xanthine                                                                                                                                                                        |        |    |
|                     | SZ23  |        | 7-dien-3-one                                                                                                                                                                    |        |    |
|                     | SZ24  |        | hexanal                                                                                                                                                                         |        |    |
|                     | SZ25  |        | nicotinic acid                                                                                                                                                                  |        |    |
|                     | SZ26  |        | hirudin                                                                                                                                                                         |        |    |
|                     | SZ27  |        | heparin                                                                                                                                                                         |        |    |
|                     | SZ28  |        | antithrombin                                                                                                                                                                    |        |    |
| Human Placenta      | ZHC1  |        | acetylcholine                                                                                                                                                                   |        |    |
|                     | ZHC2  |        | estrone                                                                                                                                                                         |        |    |
|                     | ZHC3  |        | testosterone                                                                                                                                                                    |        |    |
|                     | ZHC4  |        | 4-pregnene-17 $\alpha$ , 20 $\alpha$ , 21-triol-3, 11-dione                                                                                                                     |        |    |
|                     | ZHC5  |        | Mmp-2/mmp-9 inhibitor II                                                                                                                                                        |        |    |
|                     | ZHC6  |        | 11-dehydrocorticosterone                                                                                                                                                        |        |    |
|                     | ZHC7  |        | 11-desoxycorticosterone                                                                                                                                                         |        |    |
|                     | ZHC8  |        | tetrahydrocorticosterone                                                                                                                                                        |        |    |
|                     | ZHC9  |        | progesterone                                                                                                                                                                    |        |    |
|                     | ZHC10 |        | 17-hydroxycorticosterone                                                                                                                                                        |        |    |
|                     | ZHC11 |        | estradiol                                                                                                                                                                       |        |    |
|                     | ZHC12 |        | estriol                                                                                                                                                                         |        |    |
| Periostracum Cicada | CT1   |        | glutamic acid                                                                                                                                                                   |        |    |
|                     | CT2   |        | phenylalanine                                                                                                                                                                   |        |    |
|                     | CT3   |        | lysine                                                                                                                                                                          |        |    |
|                     | CT4   |        | ecdysterone 20,22-monoacetone                                                                                                                                                   |        |    |
|                     | CT5   |        | Hydroxyecdysone                                                                                                                                                                 |        |    |
|                     | CT6   |        | (3S,5R,9R,10R,13R,14S,17S)-3,14-dihydroxy-10,13-dimethyl-17-[(2R,3R)-2,3,6-trihydroxy-6-methylheptan-2-yl]-2,3,4,5,9,11,12,15,16,17-decahydro-1H-cyclopenta[a]phenanthren-6-one |        |    |
|                     | CT7   |        | Ornithine                                                                                                                                                                       |        |    |
|                     | CT8   |        | Glutamic acid                                                                                                                                                                   |        |    |
|                     | CT9   |        | Phenylalanine                                                                                                                                                                   |        |    |
|                     | CT10  |        | Lysine                                                                                                                                                                          |        |    |
|                     | CT11  |        | ornithine                                                                                                                                                                       |        |    |

**Supplementary Table S2: Information on potential targets**

| No. | Gene name | Protein names                                        | UniProt ID | Degree |
|-----|-----------|------------------------------------------------------|------------|--------|
| 1   | PTGS2     | Prostaglandin G/H synthase 2                         | P35354     | 103    |
| 2   | NCOA2     | Nuclear receptor coactivator 2                       | Q15596     | 86     |
| 3   | PGR       | Progesterone receptor                                | P06401     | 75     |
| 4   | PTGS1     | Prostaglandin G/H synthase 1                         | P23219     | 70     |
| 5   | PPARG     | Peroxisome proliferator-activated receptor gamma     | P37231     | 49     |
| 6   | SCN5A     | Sodium channel protein type 5 subunit alpha          | Q14524     | 46     |
| 7   | ADRB2     | Beta-2 adrenergic receptor                           | P07550     | 45     |
| 8   | NR3C2     | Mineralocorticoid receptor                           | P08235     | 44     |
| 9   | GABRA1    | Gamma-aminobutyric acid receptor subunit alpha-1     | P14867     | 44     |
| 10  | PRSS1     | Trypsin-1                                            | P07477     | 44     |
| 11  | RXRA      | Retinoic acid receptor RXR-alpha                     | P19793     | 40     |
| 12  | CHRM1     | Muscarinic acetylcholine receptor M1                 | P11229     | 38     |
| 13  | AR        | Androgen receptor                                    | P10275     | 38     |
| 14  | ACHE      | Acetylcholinesterase                                 | P22303     | 36     |
| 15  | NOS2      | Nitric oxide synthase, inducible                     | P35228     | 34     |
| 16  | ADRA1B    | Alpha-1B adrenergic receptor                         | P35368     | 32     |
| 17  | KCNH2     | Potassium voltage-gated channel subfamily H member 2 | Q12809     | 32     |
| 18  | CHRM3     | Muscarinic acetylcholine receptor M3                 | P20309     | 29     |
| 19  | CHRM2     | Muscarinic acetylcholine receptor M2                 | P08172     | 28     |
| 20  | ESR2      | Estrogen receptor beta                               | Q92731     | 28     |
| 21  | CASP3     | Caspase-3                                            | P42574     | 27     |
| 22  | ESR1      | Estrogen receptor                                    | P03372     | 26     |
| 23  | BCL2      | Apoptosis regulator Bcl-2                            | P10415     | 26     |
| 24  | F7        | Coagulation factor VII                               | P08709     | 25     |
| 25  | JUN       | Transcription factor AP-1                            | P05412     | 23     |
| 26  | BAX       | Apoptosis regulator BAX                              | Q07812     | 23     |
| 27  | GSK3B     | Glycogen synthase kinase-3 beta                      | P49841     | 22     |
| 28  | RELA      | Transcription factor p65                             | Q04206     | 22     |
| 29  | MAOB      | Amine oxidase [flavin-containing] B                  | P27338     | 22     |
| 30  | SLC6A2    | Sodium-dependent noradrenaline transporter           | P23975     | 20     |
| 31  | ADRA1A    | Alpha-1A adrenergic receptor                         | P35348     | 19     |
| 32  | NCOA1     | Nuclear receptor coactivator 1                       | Q15788     | 19     |
| 33  | MMP9      | Matrix metalloproteinase-9                           | P14780     | 19     |
| 34  | PLAU      | Urokinase-type plasminogen activator                 | P00749     | 19     |
| 35  | AKT1      | RAC-alpha serine/threonine-protein kinase            | P31749     | 19     |
| 36  | PPARD     | Peroxisome proliferator-activated receptor delta     | Q03181     | 18     |
| 37  | TNF       | Tumor necrosis factor                                | P01375     | 18     |
| 38  | MMP1      | Interstitial collagenase                             | P03956     | 17     |
| 39  | CASP9     | Caspase-9                                            | P55211     | 17     |
| 40  | NR3C1     | Glucocorticoid receptor                              | P04150     | 16     |
| 41  | CHEK1     | Serine/threonine-protein kinase Chk1                 | O14757     | 16     |
| 42  | PPARA     | Peroxisome proliferator-activated receptor alpha     | Q07869     | 16     |
| 43  | INSR      | Insulin receptor                                     | P06213     | 16     |
| 44  | NR1I3     | Nuclear receptor subfamily 1 group I member 3        | Q14994     | 16     |
| 45  | MPO       | Myeloperoxidase                                      | P05164     | 16     |

**Supplementary Table S2: Information on potential targets**

| No. | Gene name | Protein names                                                     | UniProt ID | Degree |
|-----|-----------|-------------------------------------------------------------------|------------|--------|
| 46  | HMOX1     | Heme oxygenase 1                                                  | P09601     | 16     |
| 47  | CASP8     | Caspase-8                                                         | Q14790     | 16     |
| 48  | SLC6A4    | Sodium-dependent serotonin transporter                            | P31645     | 15     |
| 49  | CHRM4     | Muscarinic acetylcholine receptor M4                              | P08173     | 15     |
| 50  | SLC2A4    | Solute carrier family 2, facilitated glucose transporter member 4 | P14672     | 15     |
| 51  | GSTP1     | Glutathione S-transferase P                                       | P09211     | 15     |
| 52  | TP53      | Cellular tumor antigen p53                                        | P04637     | 15     |
| 53  | IL6       | Interleukin-6                                                     | P05231     | 15     |
| 54  | SERPINA6  | Corticosteroid-binding globulin                                   | P08185     | 14     |
| 55  | SLC6A3    | Sodium-dependent dopamine transporter                             | Q01959     | 14     |
| 56  | OPRM1     | Mu-type opioid receptor                                           | P35372     | 14     |
| 57  | GSTM2     | Glutathione S-transferase Mu 2                                    | P28161     | 14     |
| 58  | PON1      | Serum paraoxonase/arylesterase 1                                  | P27169     | 14     |
| 59  | AHR       | Aryl hydrocarbon receptor                                         | P35869     | 14     |
| 60  | NR1I2     | Nuclear receptor subfamily 1 group I member 2                     | O75469     | 14     |
| 61  | ICAM1     | Intercellular adhesion molecule 1                                 | P05362     | 14     |
| 62  | CYP1A2    | Cytochrome P450 1A2                                               | P05177     | 14     |
| 63  | CYP3A4    | Cytochrome P450 3A4                                               | P08684     | 14     |
| 64  | PRKCA     | Protein kinase C alpha type                                       | P17252     | 14     |
| 65  | AHSA1     | Activator of 90 kDa heat shock protein ATPase homolog 1           | O95433     | 14     |
| 66  | CDKN1A    | Cyclin-dependent kinase inhibitor 1                               | P38936     | 14     |
| 67  | VEGFA     | Vascular endothelial growth factor A                              | P15692     | 14     |
| 68  | AKR1B10   | Aldo-keto reductase family 1 member B10                           | O60218     | 13     |
| 69  | ADRB1     | Beta-1 adrenergic receptor                                        | P08588     | 13     |
| 70  | ADRA2A    | Alpha-2A adrenergic receptor                                      | P08913     | 13     |
| 71  | ADH1C     | Alcohol dehydrogenase 1C                                          | P00326     | 13     |
| 72  | CCNA2     | Cyclin-A2                                                         | P20248     | 13     |
| 73  | GSTM1     | Glutathione S-transferase Mu 1                                    | P09488     | 13     |
| 74  | DIO1      | Type I iodothyronine deiodinase                                   | P49895     | 13     |
| 75  | PSMD3     | 26S proteasome non-ATPase regulatory subunit 3                    | O43242     | 13     |
| 76  | HAS2      | Hyaluronan synthase 2                                             | Q92819     | 13     |
| 77  | CYP1B1    | Cytochrome P450 1B1                                               | Q16678     | 13     |
| 78  | VCAM1     | Vascular cell adhesion protein 1                                  | P19320     | 13     |
| 79  | SELE      | E-selectin                                                        | P16581     | 13     |
| 80  | CYP1A1    | Cytochrome P450 1A1                                               | P04798     | 13     |
| 81  | STAT1     | Signal transducer and activator of transcription 1-alpha/beta     | P42224     | 13     |
| 82  | EGFR      | Epidermal growth factor receptor                                  | P00533     | 13     |
| 83  | PTGES     | Prostaglandin E synthase                                          | O14684     | 12     |
| 84  | BACE1     | Beta-secretase 1                                                  | P56817     | 12     |
| 85  | MAPK14    | Mitogen-activated protein kinase 14                               | Q16539     | 12     |
| 86  | ODC1      | Ornithine decarboxylase                                           | P11926     | 12     |
| 87  | MAPK1     | Mitogen-activated protein kinase 1                                | P28482     | 12     |
| 88  | MMP2      | 72 kDa type IV collagenase                                        | P08253     | 12     |
| 89  | CCND1     | G1/S-specific cyclin-D1                                           | P24385     | 12     |
| 90  | KDR       | Vascular endothelial growth factor receptor 2                     | P35968     | 11     |

**Supplementary Table S2: Information on potential targets**

| No. | Gene name | Protein names                               | UniProt ID | Degree |
|-----|-----------|---------------------------------------------|------------|--------|
| 91  | CD40LG    | CD40 ligand                                 | P29965     | 11     |
| 92  | NCF1      | Neutrophil cytosol factor 1                 | P14598     | 11     |
| 93  | TOP2A     | DNA topoisomerase 2-alpha                   | P11388     | 11     |
| 94  | IFNG      | Interferon gamma                            | P01579     | 11     |
| 95  | SERPINE1  | Plasminogen activator inhibitor 1           | P05121     | 11     |
| 96  | CCNB1     | G2/mitotic-specific cyclin-B1               | P14635     | 11     |
| 97  | IL2       | Interleukin-2                               | P60568     | 11     |
| 98  | CXCL8     | Interleukin-8                               | P10145     | 11     |
| 99  | CCL2      | C-C motif chemokine 2                       | P13500     | 11     |
| 100 | MYC       | Myc proto-oncogene protein                  | P01106     | 11     |
| 101 | ERBB2     | Receptor tyrosine-protein kinase erbB-2     | P04626     | 11     |
| 102 | HIF1A     | Hypoxia-inducible factor 1-alpha            | Q16665     | 11     |
| 103 | NFKBIA    | NF-kappa-B inhibitor alpha                  | P25963     | 11     |
| 104 | RB1       | Retinoblastoma-associated protein           | P06400     | 11     |
| 105 | EGF       | Pro-epidermal growth factor                 | P01133     | 11     |
| 106 | FOS       | Proto-oncogene c-Fos                        | P01100     | 11     |
| 107 | GRM5      | Metabotropic glutamate receptor 5           | P41594     | 10     |
| 108 | IGF2      | Insulin-like growth factor II               | P01344     | 10     |
| 109 | CTSD      | Cathepsin D                                 | P07339     | 10     |
| 110 | E2F1      | Transcription factor E2F1                   | Q01094     | 10     |
| 111 | CXCL10    | C-X-C motif chemokine 10                    | P02778     | 10     |
| 112 | CXCL2     | C-X-C motif chemokine 2                     | P19875     | 10     |
| 113 | PARP1     | Poly [ADP-ribose] polymerase 1              | P09874     | 10     |
| 114 | NFE2L2    | Nuclear factor erythroid 2-related factor 2 | Q16236     | 10     |
| 115 | PLAT      | Tissue-type plasminogen activator           | P00750     | 10     |
| 116 | NOS3      | Nitric oxide synthase, endothelial          | P29474     | 10     |
| 117 | BIRC5     | Baculoviral IAP repeat-containing protein 5 | O15392     | 10     |
| 118 | PRKCB     | Protein kinase C beta type                  | P05771     | 10     |
| 119 | PTGER3    | Prostaglandin E2 receptor EP3 subtype       | P43115     | 10     |
| 120 | IL1B      | Interleukin-1 beta                          | P01584     | 10     |
| 121 | GJA1      | Gap junction alpha-1 protein                | P17302     | 10     |
| 122 | F3        | Tissue factor                               | P13726     | 10     |
| 123 | CAV1      | Caveolin-1                                  | Q03135     | 10     |
| 124 | ACACA     | Acetyl-CoA carboxylase 1                    | Q13085     | 10     |
| 125 | SOD1      | Superoxide dismutase [Cu-Zn]                | P00441     | 10     |
| 126 | TOP1      | DNA topoisomerase 1                         | P11387     | 10     |
| 127 | IL10      | Interleukin-10                              | P22301     | 10     |
| 128 | EIF6      | Eukaryotic translation initiation factor 6  | P56537     | 10     |
| 129 | BCL2L1    | Bcl-2-like protein 1                        | Q07817     | 10     |
| 130 | ADRA1D    | Alpha-1D adrenergic receptor                | P25100     | 9      |
| 131 | CHRM5     | Muscarinic acetylcholine receptor M5        | P08912     | 9      |
| 132 | MET       | Hepatocyte growth factor receptor           | P08581     | 9      |
| 133 | RASA1     | Ras GTPase-activating protein 1             | P20936     | 9      |
| 134 | HK2       | Hexokinase-2                                | P52789     | 9      |
| 135 | NPEPPS    | Puromycin-sensitive aminopeptidase          | P55786     | 9      |



**Supplementary Table S2: Information on potential targets**

| No. | Gene name | Protein names                                               | UniProt ID | Degree |
|-----|-----------|-------------------------------------------------------------|------------|--------|
| 136 | PCOLCE    | Procollagen C-endopeptidase enhancer 1                      | Q15113     | 9      |
| 137 | ERBB3     | Receptor tyrosine-protein kinase erbB-3                     | P21860     | 9      |
| 138 | IRF1      | Interferon regulatory factor 1                              | P10914     | 9      |
| 139 | IGFBP3    | Insulin-like growth factor-binding protein 3                | P17936     | 9      |
| 140 | ACP3      | Prostatic acid phosphatase                                  | P15309     | 9      |
| 141 | E2F2      | Transcription factor E2F2                                   | Q14209     | 9      |
| 142 | RASSF1    | Ras association domain-containing protein 1                 | Q9NS23     | 9      |
| 143 | RUNX2     | Runt-related transcription factor 2                         | Q13950     | 9      |
| 144 | SPP1      | Osteopontin                                                 | P10451     | 9      |
| 145 | CHUK      | Inhibitor of nuclear factor kappa-B kinase subunit alpha    | O15111     | 9      |
| 146 | HSF1      | Heat shock factor protein 1                                 | Q00613     | 9      |
| 147 | CLDN4     | Claudin-4                                                   | O14493     | 9      |
| 148 | CHEK2     | Serine/threonine-protein kinase Chk2                        | O96017     | 9      |
| 149 | DCAF5     | DDB1- and CUL4-associated factor 5                          | Q96JK2     | 9      |
| 150 | CXCL11    | C-X-C motif chemokine 11                                    | O14625     | 9      |
| 151 | IL1A      | Interleukin-1 alpha                                         | P01583     | 9      |
| 152 | THBD      | Thrombomodulin                                              | P07204     | 9      |
| 153 | HSPB1     | Heat shock protein beta-1                                   | P04792     | 9      |
| 154 | DUOX2     | Dual oxidase 2                                              | Q9NRD8     | 9      |
| 155 | RUNX1T1   | Protein CBFA2T1                                             | Q06455     | 9      |
| 156 | RAF1      | RAF proto-oncogene serine/threonine-protein kinase          | P04049     | 9      |
| 157 | POR       | NADPH--cytochrome P450 reductase                            | P16435     | 9      |
| 158 | ELK1      | ETS domain-containing protein Elk-1                         | P19419     | 9      |
| 159 | MMP3      | Stromelysin-1                                               | P08254     | 9      |
| 160 | OPRD1     | Delta-type opioid receptor                                  | P41143     | 8      |
| 161 | ANPEP     | Aminopeptidase N                                            | P15144     | 8      |
| 162 | SLC1A1    | Excitatory amino acid transporter 3                         | P43005     | 8      |
| 163 | CTSK      | Cathepsin K                                                 | P43235     | 7      |
| 164 | F2R       | Proteinase-activated receptor 1                             | P25116     | 7      |
| 165 | RORA      | Nuclear receptor ROR-alpha                                  | P35398     | 7      |
| 166 | JAK2      | Tyrosine-protein kinase JAK2                                | O60674     | 7      |
| 167 | MTOR      | Serine/threonine-protein kinase mTOR                        | P42345     | 7      |
| 168 | LTA4H     | Leukotriene A-4 hydrolase                                   | P09960     | 7      |
| 169 | CHRNA2    | Neuronal acetylcholine receptor subunit alpha-2             | Q15822     | 7      |
| 170 | GPBAR1    | G-protein coupled bile acid receptor 1                      | Q8TDU6     | 6      |
| 171 | HSD17B2   | Estradiol 17-beta-dehydrogenase 2                           | P37059     | 6      |
| 172 | FFAR1     | Free fatty acid receptor 1                                  | O14842     | 6      |
| 173 | HRH3      | Histamine H3 receptor                                       | Q9Y5N1     | 6      |
| 174 | MCL1      | Induced myeloid leukemia cell differentiation protein Mcl-1 | Q07820     | 6      |
| 175 | ADRA2C    | Alpha-2C adrenergic receptor                                | P18825     | 6      |
| 176 | ADRA2B    | Alpha-2B adrenergic receptor                                | P18089     | 6      |
| 177 | G6PD      | Glucose-6-phosphate 1-dehydrogenase                         | P11413     | 6      |
| 178 | KDM4C     | Lysine-specific demethylase 4C                              | Q9H3R0     | 6      |
| 179 | GRM2      | Metabotropic glutamate receptor 2                           | Q14416     | 6      |
| 180 | GRM7      | Metabotropic glutamate receptor 7                           | Q14831     | 6      |

**Supplementary Table S2: Information on potential targets**

| No. | Gene name | Protein names                                                           | UniProt ID | Degree |
|-----|-----------|-------------------------------------------------------------------------|------------|--------|
| 181 | GRM8      | Metabotropic glutamate receptor 8                                       | O00222     | 6      |
| 182 | GRM4      | Metabotropic glutamate receptor 4                                       | Q14833     | 6      |
| 183 | CTRB1     | Chymotrypsinogen B                                                      | P17538     | 6      |
| 184 | MAOA      | Amine oxidase [flavin-containing] A                                     | P21397     | 6      |
| 185 | MAP2      | Microtubule-associated protein 2                                        | P11137     | 6      |
| 186 | HSD17B1   | Estradiol 17-beta-dehydrogenase 1                                       | P14061     | 5      |
| 187 | UGT2B7    | UDP-glucuronosyltransferase 2B7                                         | P16662     | 5      |
| 188 | STS       | Steryl-sulfatase                                                        | P08842     | 5      |
| 189 | CDK1      | Cyclin-dependent kinase 1                                               | P06493     | 5      |
| 190 | HRH4      | Histamine H4 receptor                                                   | Q9H3N8     | 5      |
| 191 | HDAC3     | Histone deacetylase 3                                                   | O15379     | 5      |
| 192 | PLG       | Plasminogen                                                             | P00747     | 5      |
| 193 | EGLN1     | Egl nine homolog 1                                                      | Q9GZT9     | 5      |
| 194 | TERT      | Telomerase reverse transcriptase                                        | O14746     | 5      |
| 195 | MGLL      | Monoglyceride lipase                                                    | Q99685     | 5      |
| 196 | OAT       | Ornithine aminotransferase, mitochondrial                               | P04181     | 5      |
| 197 | MAP2K1    | Dual specificity mitogen-activated protein kinase kinase 1              | Q02750     | 5      |
| 198 | REN       | Renin                                                                   | P00797     | 5      |
| 199 | POLB      | DNA polymerase beta                                                     | P06746     | 5      |
| 200 | PEPD      | Xaa-Pro dipeptidase                                                     | P12955     | 5      |
| 201 | SLC1A2    | Excitatory amino acid transporter 2                                     | P43004     | 5      |
| 202 | GRM6      | Metabotropic glutamate receptor 6                                       | O15303     | 5      |
| 203 | GRM1      | Metabotropic glutamate receptor 1                                       | Q13255     | 5      |
| 204 | GRM3      | Metabotropic glutamate receptor 3                                       | Q14832     | 5      |
| 205 | IKBKB     | Inhibitor of nuclear factor kappa-B kinase subunit beta                 | O14920     | 5      |
| 206 | JAK1      | Tyrosine-protein kinase JAK1                                            | P23458     | 4      |
| 207 | KDM5C     | Lysine-specific demethylase 5C                                          | P41229     | 4      |
| 208 | PHF8      | Histone lysine demethylase PHF8                                         | Q9UPP1     | 4      |
| 209 | KDM2A     | Lysine-specific demethylase 2A                                          | Q9Y2K7     | 4      |
| 210 | ROCK2     | Rho-associated protein kinase 2                                         | O75116     | 4      |
| 211 | CD81      | CD81 antigen                                                            | P60033     | 4      |
| 212 | KMO       | Kynurenine 3-monooxygenase                                              | O15229     | 4      |
| 213 | PLA2G4A   | Cytosolic phospholipase A2                                              | P47712     | 4      |
| 214 | HTR3A     | 5-hydroxytryptamine receptor 3A                                         | P46098     | 4      |
| 215 | CRHR1     | Corticotropin-releasing factor receptor 1                               | P34998     | 4      |
| 216 | GLUL      | Glutamine synthetase                                                    | P15104     | 4      |
| 217 | IRAK4     | Interleukin-1 receptor-associated kinase 4                              | Q9NWZ3     | 4      |
| 218 | CLK4      | Dual specificity protein kinase CLK4                                    | Q9HAZ1     | 4      |
| 219 | FGFR1     | Fibroblast growth factor receptor 1                                     | P11362     | 4      |
| 220 | CDK2      | Cyclin-dependent kinase 2                                               | P24941     | 4      |
| 221 | P2RX3     | P2X purinoceptor 3                                                      | P56373     | 4      |
| 222 | SYK       | Tyrosine-protein kinase SYK                                             | P43405     | 4      |
| 223 | SLPI      | Antileukoproteinase                                                     | P03973     | 4      |
| 224 | AKR1C3    | Aldo-keto reductase family 1 member C3                                  | P42330     | 4      |
| 225 | PPP3CA    | Serine/threonine-protein phosphatase 2B catalytic subunit alpha isoform | Q08209     | 4      |

**Supplementary Table S2: Information on potential targets**

| No. | Gene name | Protein names                                                    | UniProt ID | Degree |
|-----|-----------|------------------------------------------------------------------|------------|--------|
| 226 | MAPK8     | Mitogen-activated protein kinase 8                               | P45983     | 4      |
| 227 | GRIA2     | Glutamate receptor 2                                             | P42262     | 4      |
| 228 | SLC22A2   | Solute carrier family 22 member 2                                | O15244     | 3      |
| 229 | ADCY10    | Adenylate cyclase type 10                                        | Q96PN6     | 3      |
| 230 | GPER1     | G-protein coupled estrogen receptor 1                            | Q99527     | 3      |
| 231 | HLCS      | Biotin--protein ligase                                           | P50747     | 3      |
| 232 | PTK2      | Focal adhesion kinase 1                                          | Q05397     | 3      |
| 233 | SELP      | P-selectin                                                       | P16109     | 3      |
| 234 | HDAC6     | Histone deacetylase 6                                            | Q9UBN7     | 3      |
| 235 | TRPA1     | Transient receptor potential cation channel subfamily A member 1 | O75762     | 3      |
| 236 | P2RX7     | P2X purinoceptor 7                                               | Q99572     | 3      |
| 237 | ALK       | ALK tyrosine kinase receptor                                     | Q9UM73     | 3      |
| 238 | LTB4R     | Leukotriene B4 receptor 1                                        | Q15722     | 3      |
| 239 | MMP14     | Matrix metalloproteinase-14                                      | P50281     | 3      |
| 240 | CYP26A1   | Cytochrome P450 26A1                                             | O43174     | 3      |
| 241 | NPY5R     | Neuropeptide Y receptor type 5                                   | Q15761     | 3      |
| 242 | MAP3K5    | Mitogen-activated protein kinase kinase kinase 5                 | Q99683     | 3      |
| 243 | CPT1A     | Carnitine O-palmitoyltransferase 1, liver isoform                | P50416     | 3      |
| 244 | SLC5A1    | Sodium/glucose cotransporter 1                                   | P13866     | 3      |
| 245 | RARA      | Retinoic acid receptor alpha                                     | P10276     | 3      |
| 246 | RARB      | Retinoic acid receptor beta                                      | P10826     | 3      |
| 247 | RARG      | Retinoic acid receptor gamma                                     | P13631     | 3      |
| 248 | CNR2      | Cannabinoid receptor 2                                           | P34972     | 3      |
| 249 | ACP1      | Low molecular weight phosphotyrosine protein phosphatase         | P24666     | 3      |
| 250 | RORC      | Nuclear receptor ROR-gamma                                       | P51449     | 3      |
| 251 | ACE       | Angiotensin-converting enzyme                                    | P12821     | 3      |
| 252 | BBOX1     | Gamma-butyrobetaine dioxygenase                                  | O75936     | 3      |
| 253 | TBXA2R    | Thromboxane A2 receptor                                          | P21731     | 3      |
| 254 | F2        | Prothrombin                                                      | P00734     | 3      |
| 255 | ALPL      | Alkaline phosphatase, tissue-nonspecific isozyme                 | P05186     | 3      |
| 256 | HRH1      | Histamine H1 receptor                                            | P35367     | 3      |
| 257 | PDE10A    | cAMP and cAMP-inhibited cGMP 3',5'-cyclic phosphodiesterase 10A  | Q9Y233     | 3      |
| 258 | MAPKAPK2  | MAP kinase-activated protein kinase 2                            | P49137     | 3      |
| 259 | IMPDH2    | Inosine-5'-monophosphate dehydrogenase 2                         | P12268     | 3      |
| 260 | DYRK1B    | Dual specificity tyrosine-phosphorylation-regulated kinase 1B    | Q9Y463     | 3      |
| 261 | CLK2      | Dual specificity protein kinase CLK2                             | P49760     | 3      |
| 262 | GSK3A     | Glycogen synthase kinase-3 alpha                                 | P49840     | 3      |
| 263 | SLC5A2    | Sodium/glucose cotransporter 2                                   | P31639     | 3      |
| 264 | SORD      | Sorbitol dehydrogenase                                           | Q00796     | 3      |
| 265 | CCR1      | C-C chemokine receptor type 1                                    | P32246     | 3      |
| 266 | AGTR1     | Type-1 angiotensin II receptor                                   | P30556     | 3      |
| 267 | FLT1      | Vascular endothelial growth factor receptor 1                    | P17948     | 3      |
| 268 | PGK1      | Phosphoglycerate kinase 1                                        | P00558     | 3      |
| 269 | CPB1      | Carboxypeptidase B                                               | P15086     | 3      |

**Supplementary Table S2: Information on potential targets**

| No. | Gene name | Protein names                                        | UniProt ID | Degree |
|-----|-----------|------------------------------------------------------|------------|--------|
| 270 | TAAR1     | Trace amine-associated receptor 1                    | Q96RJ0     | 3      |
| 271 | FASN      | Fatty acid synthase                                  | P49327     | 3      |
| 272 | CPA3      | Mast cell carboxypeptidase A                         | P15088     | 3      |
| 273 | CCR5      | C-C chemokine receptor type 5                        | P51681     | 2      |
| 274 | ADRB3     | Beta-3 adrenergic receptor                           | P13945     | 2      |
| 275 | AHCY      | Adenosylhomocysteinase                               | P23526     | 2      |
| 276 | MAP3K8    | Mitogen-activated protein kinase kinase kinase 8     | P41279     | 2      |
| 277 | PARP2     | Poly [ADP-ribose] polymerase 2                       | Q9UGN5     | 2      |
| 278 | UPP1      | Uridine phosphorylase 1                              | Q16831     | 2      |
| 279 | TK1       | Thymidine kinase, cytosolic                          | P04183     | 2      |
| 280 | RPS6KA5   | Ribosomal protein S6 kinase alpha-5                  | O75582     | 2      |
| 281 | TKT       | Transketolase                                        | P29401     | 2      |
| 282 | CFTR      | Cystic fibrosis transmembrane conductance regulator  | P13569     | 2      |
| 283 | ECE1      | Endothelin-converting enzyme 1                       | P42892     | 2      |
| 284 | GZMB      | Granzyme B                                           | P10144     | 2      |
| 285 | ABCC1     | Multidrug resistance-associated protein 1            | P33527     | 2      |
| 286 | CRP       | C-reactive protein [Cleaved into: C-reactive protein | P02741     | 2      |
| 287 | PDGFB     | Platelet-derived growth factor subunit B             | P01127     | 2      |
| 288 | CXCR4     | C-X-C chemokine receptor type 4                      | P61073     | 2      |
| 289 | HDAC2     | Histone deacetylase 2                                | Q92769     | 2      |
| 290 | EPHX1     | Epoxide hydrolase 1                                  | P07099     | 2      |
| 291 | BRD4      | Bromodomain-containing protein 4                     | O60885     | 2      |
| 292 | HCK       | Tyrosine-protein kinase HCK                          | P08631     | 2      |
| 293 | HCAR2     | Hydroxycarboxylic acid receptor 2                    | Q8TDS4     | 2      |
| 294 | JAK3      | Tyrosine-protein kinase JAK3                         | P52333     | 2      |
| 295 | PDGFRA    | Platelet-derived growth factor receptor alpha        | P16234     | 2      |
| 296 | PDGFRB    | Platelet-derived growth factor receptor beta         | P09619     | 2      |
| 297 | GCGR      | Glucagon receptor                                    | P47871     | 2      |
| 298 | FGFR3     | Fibroblast growth factor receptor 3                  | P22607     | 2      |
| 299 | LIMK2     | LIM domain kinase 2                                  | P53671     | 2      |
| 300 | QPCT      | Glutaminy-peptide cyclotransferase                   | Q16769     | 2      |
| 301 | AKR1C1    | Aldo-keto reductase family 1 member C1               | Q04828     | 2      |
| 302 | PREP      | Prolyl endopeptidase                                 | P48147     | 2      |
| 303 | CNR1      | Cannabinoid receptor 1                               | P21554     | 2      |
| 304 | SCD       | Acyl-CoA desaturase                                  | O00767     | 2      |
| 305 | FABP1     | Fatty acid-binding protein, liver                    | P07148     | 2      |
| 306 | KYNU      | Kynureninase                                         | Q16719     | 2      |
| 307 | MIF       | Macrophage migration inhibitory factor               | P14174     | 2      |
| 308 | MME       | Neprilysin                                           | P08473     | 2      |
| 309 | CAT       | Catalase                                             | P04040     | 2      |
| 310 | FN1       | Fibronectin                                          | P02751     | 2      |
| 311 | PCNA      | Proliferating cell nuclear antigen                   | P12004     | 2      |
| 312 | IL4       | Interleukin-4                                        | P05112     | 2      |
| 313 | PKIA      | cAMP-dependent protein kinase inhibitor alpha        | P61925     | 2      |
| 314 | CA12      | Carbonic anhydrase 12                                | O43570     | 2      |

**Supplementary Table S2: Information on potential targets**

| No. | Gene name | Protein names                                         | UniProt ID | Degree |
|-----|-----------|-------------------------------------------------------|------------|--------|
| 315 | NQO2      | Ribosylidihyronicotinamide dehydrogenase [quinone]    | P16083     | 2      |
| 316 | ALOX5     | Polyunsaturated fatty acid 5-lipoxygenase             | P09917     | 2      |
| 317 | CASP7     | Caspase-7                                             | P55210     | 2      |
| 318 | CTNNB1    | Catenin beta-1                                        | P35222     | 2      |
| 319 | RNPEP     | Aminopeptidase B                                      | Q9H4A4     | 2      |
| 320 | PLK1      | Serine/threonine-protein kinase PLK1                  | P53350     | 2      |
| 321 | MAPK7     | Mitogen-activated protein kinase 7                    | Q13164     | 2      |
| 322 | CDK7      | Cyclin-dependent kinase 7                             | P50613     | 2      |
| 323 | SF3B3     | Splicing factor 3B subunit 3                          | Q15393     | 2      |
| 324 | MCHR1     | Melanin-concentrating hormone receptor 1              | Q99705     | 2      |
| 325 | GRB2      | Growth factor receptor-bound protein 2                | P62993     | 2      |
| 326 | TBXAS1    | Thromboxane-A synthase                                | P24557     | 2      |
| 327 | TYRO3     | Tyrosine-protein kinase receptor TYRO3                | Q06418     | 2      |
| 328 | AXL       | Tyrosine-protein kinase receptor UFO                  | P30530     | 2      |
| 329 | SMO       | Smoothed homolog                                      | Q99835     | 2      |
| 330 | AVPR1A    | Vasopressin V1a receptor                              | P37288     | 2      |
| 331 | CFD       | Complement factor D                                   | P00746     | 2      |
| 332 | OLR1      | Oxidized low-density lipoprotein receptor 1           | P78380     | 2      |
| 333 | PYGM      | Glycogen phosphorylase, muscle form                   | P11217     | 2      |
| 334 | HSP90AA1  | Heat shock protein HSP 90-alpha                       | P07900     | 1      |
| 335 | CENPE     | Centromere-associated protein E                       | Q02224     | 1      |
| 336 | CYP2C19   | Cytochrome P450 2C19                                  | P33261     | 1      |
| 337 | ERN1      | Serine/threonine-protein kinase/endoribonuclease IRE1 | O75460     | 1      |
| 338 | HDAC7     | Histone deacetylase 7                                 | Q8WUI4     | 1      |
| 339 | HDAC9     | Histone deacetylase 9                                 | Q9UKVO     | 1      |
| 340 | HDAC5     | Histone deacetylase 5                                 | Q9UQL6     | 1      |
| 341 | STAT6     | Signal transducer and activator of transcription 6    | P42226     | 1      |
| 342 | HDAC4     | Histone deacetylase 4                                 | P56524     | 1      |
| 343 | HSP90AB1  | Heat shock protein HSP 90-beta                        | P08238     | 1      |
| 344 | ROS1      | Proto-oncogene tyrosine-protein kinase ROS            | P08922     | 1      |
| 345 | EP300     | Histone acetyltransferase p300                        | Q09472     | 1      |
| 346 | CCR3      | C-C chemokine receptor type 3                         | P51677     | 1      |
| 347 | MMP16     | Matrix metalloproteinase-16                           | P51512     | 1      |
| 348 | ADK       | Adenosine kinase                                      | P55263     | 1      |
| 349 | CYP27A1   | Sterol 26-hydroxylase, mitochondrial                  | Q02318     | 1      |
| 350 | TTR       | Transthyretin                                         | P02766     | 1      |
| 351 | MAP3K7    | Mitogen-activated protein kinase kinase kinase 7      | O43318     | 1      |
| 352 | KCNK2     | Potassium channel subfamily K member 2                | O95069     | 1      |
| 353 | PTGES2    | Prostaglandin E synthase 2                            | Q9H7Z7     | 1      |
| 354 | TNFRSF1B  | Tumor necrosis factor receptor superfamily member 1B  | P20333     | 1      |
| 355 | KCNK10    | Potassium channel subfamily K member 10               | P57789     | 1      |
| 356 | ABCC4     | Multidrug resistance-associated protein 4             | O15439     | 1      |
| 357 | ABCG1     | ATP-binding cassette sub-family G member 1            | P45844     | 1      |
| 358 | CETP      | Cholesteryl ester transfer protein                    | P11597     | 1      |
| 359 | C1R       | Complement C1r subcomponent                           | P00736     | 1      |

**Supplementary Table S2: Information on potential targets**

| No. | Gene name | Protein names                                                    | UniProt ID | Degree |
|-----|-----------|------------------------------------------------------------------|------------|--------|
| 360 | UCP2      | Mitochondrial uncoupling protein 2                               | P55851     | 1      |
| 361 | ALDH3A1   | Aldehyde dehydrogenase, dimeric NADP-preferring                  | P30838     | 1      |
| 362 | ALDH2     | Aldehyde dehydrogenase, mitochondrial                            | P05091     | 1      |
| 363 | GLB1      | Beta-galactosidase                                               | P16278     | 1      |
| 364 | PECAM1    | Platelet endothelial cell adhesion molecule                      | P16284     | 1      |
| 365 | TNFRSF1A  | Tumor necrosis factor receptor superfamily member 1A             | P19438     | 1      |
| 366 | RXRG      | Retinoic acid receptor RXR-gamma                                 | P48443     | 1      |
| 367 | TRPV1     | Transient receptor potential cation channel subfamily V member 1 | Q8NER1     | 1      |
| 368 | PTPRA     | Receptor-type tyrosine-protein phosphatase alpha                 | P18433     | 1      |
| 369 | THRA      | Thyroid hormone receptor alpha                                   | P10827     | 1      |
| 370 | BHMT2     | S-methylmethionine--homocysteine S-methyltransferase BHMT2       | Q9H2M3     | 1      |
| 371 | HNF4A     | Hepatocyte nuclear factor 4-alpha                                | P41235     | 1      |
| 372 | RORB      | Nuclear receptor ROR-beta                                        | Q92753     | 1      |
| 373 | GLRA1     | Glycine receptor subunit alpha-1                                 | P23415     | 1      |
| 374 | CYP26B1   | Cytochrome P450 26B1                                             | Q9NR63     | 1      |
| 375 | NROB2     | Nuclear receptor subfamily O group B member 2                    | Q15466     | 1      |
| 376 | GSTK1     | Glutathione S-transferase kappa 1                                | Q9Y2Q3     | 1      |
| 377 | HAO1      | Hydroxyacid oxidase 1                                            | Q9UJM8     | 1      |
| 378 | CPA1      | Carboxypeptidase A1                                              | P15085     | 1      |
| 379 | ACLY      | ATP-citrate synthase                                             | P53396     | 1      |
| 380 | SLC13A5   | Solute carrier family 13 member 5                                | Q86YT5     | 1      |
| 381 | TAGLN2    | Transgelin-2                                                     | P37802     | 1      |
| 382 | SULF1     | Extracellular sulfatase Sulf-1                                   | Q8IWU6     | 1      |
| 383 | STIP1     | Stress-induced-phosphoprotein 1                                  | P31948     | 1      |
| 384 | SLK       | STE20-like serine/threonine-protein kinase                       | Q9H2G2     | 1      |
| 385 | SLC5A3    | Sodium/myo-inositol cotransporter                                | P53794     | 1      |
| 386 | SFRP1     | Secreted frizzled-related protein 1                              | Q8N474     | 1      |
| 387 | SEPTIN2   | Septin-2                                                         | Q15019     | 1      |
| 388 | SDC4      | Syndecan-4                                                       | P31431     | 1      |
| 389 | SDC2      | Syndecan-2                                                       | P34741     | 1      |
| 390 | SDC1      | Syndecan-1                                                       | P18827     | 1      |
| 391 | S100B     | Protein S100-B                                                   | P04271     | 1      |
| 392 | S100A1    | Protein S100-A1                                                  | P23297     | 1      |
| 393 | RAC1      | Ras-related C3 botulinum toxin substrate 1                       | P63000     | 1      |
| 394 | PXN       | Paxillin                                                         | P49023     | 1      |
| 395 | PSME1     | Proteasome activator complex subunit 1                           | Q06323     | 1      |
| 396 | PSMB7     | Proteasome subunit beta type-7                                   | Q99436     | 1      |
| 397 | PSMB6     | Proteasome subunit beta type-6                                   | P28072     | 1      |
| 398 | PROC      | Vitamin K-dependent protein C                                    | P04070     | 1      |
| 399 | PPBP      | Platelet basic protein                                           | P02775     | 1      |
| 400 | PITPNA    | Phosphatidylinositol transfer protein alpha isoform              | Q00169     | 1      |
| 401 | PDHB      | Pyruvate dehydrogenase E1 component subunit beta, mitochondrial  | P11177     | 1      |
| 402 | PARK7     | Parkinson disease protein 7                                      | Q99497     | 1      |
| 403 | NFKB1     | Nuclear factor NF-kappa-B p105 subunit                           | P19838     | 1      |

**Supplementary Table S2: Information on potential targets**

| No. | Gene name | Protein names                                                                   | UniProt ID | Degree |
|-----|-----------|---------------------------------------------------------------------------------|------------|--------|
| 404 | NFATC3    | Nuclear factor of activated T-cells, cytoplasmic 3                              | Q12968     | 1      |
| 405 | MSN       | Moesin                                                                          | P26038     | 1      |
| 406 | LPL       | Lipoprotein lipase                                                              | P06858     | 1      |
| 407 | LDHB      | L-lactate dehydrogenase B chain                                                 | P07195     | 1      |
| 408 | KRT18     | Keratin, type I cytoskeletal 18                                                 | P05783     | 1      |
| 409 | KLF4      | Krueppel-like factor 4                                                          | O43474     | 1      |
| 410 | ITGAX     | Integrin alpha-X                                                                | P20702     | 1      |
| 411 | IGSF10    | Immunoglobulin superfamily member 10                                            | Q6WRI0     | 1      |
| 412 | HRG       | Histidine-rich glycoprotein                                                     | P04196     | 1      |
| 413 | GNS       | N-acetylglucosamine-6-sulfatase                                                 | P15586     | 1      |
| 414 | GATA4     | Transcription factor GATA-4                                                     | P43694     | 1      |
| 415 | FOLR1     | Folate receptor alpha                                                           | P15328     | 1      |
| 416 | FGF8      | Fibroblast growth factor 8                                                      | P55075     | 1      |
| 417 | FGF6      | Fibroblast growth factor 6                                                      | P10767     | 1      |
| 418 | FGF4      | Fibroblast growth factor 4                                                      | P08620     | 1      |
| 419 | FGF3      | Fibroblast growth factor 3                                                      | P11487     | 1      |
| 420 | FGF10     | Fibroblast growth factor 10                                                     | O15520     | 1      |
| 421 | FGA       | Fibrinogen alpha chain [Cleaved into: Fibrinopeptide A; Fibrinogen alpha chain] | P02671     | 1      |
| 422 | FCGR2A    | Low affinity immunoglobulin gamma Fc region receptor II-a                       | P12318     | 1      |
| 423 | FAS       | Tumor necrosis factor receptor superfamily member 6                             | P25445     | 1      |
| 424 | EGLN3     | Prolyl hydroxylase EGLN3                                                        | Q9H6Z9     | 1      |
| 425 | DES       | Desmin                                                                          | P17661     | 1      |
| 426 | DDAH2     | N                                                                               | O95865     | 1      |
| 427 | CSF3      | Granulocyte colony-stimulating factor                                           | P09919     | 1      |
| 428 | CR1       | Complement receptor type 1                                                      | P17927     | 1      |
| 429 | COL1A1    | Collagen alpha-1                                                                | P02452     | 1      |
| 430 | COL18A1   | Collagen alpha-1                                                                | P39060     | 1      |
| 431 | CASP12    | Inactive caspase-12                                                             | Q6UXS9     | 1      |
| 432 | CAPG      | Macrophage-capping protein                                                      | P40121     | 1      |
| 433 | CACNA1E   | Voltage-dependent R-type calcium channel subunit alpha-1E                       | Q15878     | 1      |
| 434 | C5        | Complement C5                                                                   | P01031     | 1      |
| 435 | BMPR1A    | Bone morphogenetic protein receptor type-1A                                     | P36894     | 1      |
| 436 | ATP1B1    | Sodium/potassium-transporting ATPase subunit beta-1                             | P05026     | 1      |
| 437 | ARHGDI1   | Rho GDP-dissociation inhibitor 1                                                | P52565     | 1      |
| 438 | APCS      | Serum amyloid P-component                                                       | P02743     | 1      |
| 439 | ANXA6     | Annexin A6                                                                      | P08133     | 1      |
| 440 | AGT       | Angiotensinogen                                                                 | P01019     | 1      |
| 441 | ADAMTS1   | A disintegrin and metalloproteinase with thrombospondin motifs 1                | Q9UHI8     | 1      |
| 442 | ACTR3     | Actin-related protein 3                                                         | P61158     | 1      |
| 443 | ACKR3     | Atypical chemokine receptor 3                                                   | P25106     | 1      |
| 444 | THBS1     | Thrombospondin-1                                                                | P07996     | 1      |
| 445 | TFRC      | Transferrin receptor protein 1                                                  | P02786     | 1      |
| 446 | SELL      | L-selectin                                                                      | P14151     | 1      |
| 447 | S100A6    | Protein S100-A6                                                                 | P06703     | 1      |

**Supplementary Table S2: Information on potential targets**

| No. | Gene name | Protein names                                                                          | UniProt ID | Degree |
|-----|-----------|----------------------------------------------------------------------------------------|------------|--------|
| 448 | PSMB5     | Proteasome subunit beta type-5                                                         | P28074     | 1      |
| 449 | MAP2K2    | Dual specificity mitogen-activated protein kinase kinase 2                             | P36507     | 1      |
| 450 | ITGAM     | Integrin alpha-M                                                                       | P11215     | 1      |
| 451 | HPSE      | Heparanase                                                                             | Q9Y251     | 1      |
| 452 | GPT       | Alanine aminotransferase 1                                                             | P24298     | 1      |
| 453 | FGF5      | Fibroblast growth factor 5                                                             | P12034     | 1      |
| 454 | FGF19     | Fibroblast growth factor 19                                                            | O95750     | 1      |
| 455 | CXCL12    | Stromal cell-derived factor 1                                                          | P48061     | 1      |
| 456 | CDKN1B    | Cyclin-dependent kinase inhibitor 1B                                                   | P46527     | 1      |
| 457 | CCL11     | Eotaxin                                                                                | P51671     | 1      |
| 458 | ACTA2     | Actin, aortic smooth muscle                                                            | P62736     | 1      |
| 459 | TGFB1     | Transforming growth factor beta-1 proprotein [Cleaved into: Latency-associated peptide | P01137     | 1      |
| 460 | MAPT      | Microtubule-associated protein tau                                                     | P10636     | 1      |
| 461 | FGF23     | Fibroblast growth factor 23                                                            | Q9GZV9     | 1      |
| 462 | C3        | Complement C3                                                                          | P01024     | 1      |
| 463 | BMP6      | Bone morphogenetic protein 6                                                           | P22004     | 1      |
| 464 | FGF7      | Fibroblast growth factor 7                                                             | P21781     | 1      |
| 465 | MAPK3     | Mitogen-activated protein kinase 3                                                     | P27361     | 1      |
| 466 | HGF       | Hepatocyte growth factor                                                               | P14210     | 1      |
| 467 | FGFR4     | Fibroblast growth factor receptor 4                                                    | P22455     | 1      |
| 468 | F10       | Coagulation factor X                                                                   | P00742     | 1      |
| 469 | HAMP      | Hepcidin                                                                               | P81172     | 1      |
| 470 | PF4       | Platelet factor 4                                                                      | P02776     | 1      |
| 471 | APP       | Amyloid-beta precursor protein                                                         | P05067     | 1      |
| 472 | FGFR2     | Fibroblast growth factor receptor 2                                                    | P21802     | 1      |
| 473 | EDN1      | Endothelin-1                                                                           | P05305     | 1      |
| 474 | SERPINC1  | Antithrombin-III                                                                       | P01008     | 1      |
| 475 | FGF1      | Fibroblast growth factor 1                                                             | P05230     | 1      |
| 476 | FGF2      | Fibroblast growth factor 2                                                             | P09038     | 1      |
| 477 | P2RY12    | P2Y purinoceptor 12                                                                    | Q9H244     | 1      |
| 478 | F2RL3     | Proteinase-activated receptor 4                                                        | Q96RI0     | 1      |
| 479 | CGB3      | Choriogonadotropin subunit beta 3                                                      | P0DN86     | 1      |
| 480 | ITGA3     | Integrin alpha-3                                                                       | P26006     | 1      |
| 481 | ITGA4     | Integrin alpha-4                                                                       | P13612     | 1      |
| 482 | AVPR1B    | Vasopressin V1b receptor                                                               | P47901     | 1      |
| 483 | CHIA      | Acidic mammalian chitinase                                                             | Q9BZP6     | 1      |
| 484 | OPRL1     | Nociceptin receptor                                                                    | P41146     | 1      |
| 485 | PSMB8     | Proteasome subunit beta type-8                                                         | P28062     | 1      |
| 486 | PSMB9     | Proteasome subunit beta type-9                                                         | P28065     | 1      |
| 487 | NPY4R     | Neuropeptide Y receptor type 4                                                         | P50391     | 1      |
| 488 | OXTR      | Oxytocin receptor                                                                      | P30559     | 1      |
| 489 | FURIN     | Furin                                                                                  | P09958     | 1      |
| 490 | NPFFR2    | Neuropeptide FF receptor 2                                                             | Q9Y5X5     | 1      |
| 491 | NPFFR1    | Neuropeptide FF receptor 1                                                             | Q9GZQ6     | 1      |
| 492 | HDAC11    | Histone deacetylase 11                                                                 | Q96DB2     | 1      |



**Supplementary Table S2: Information on potential targets**

| No. | Gene name | Protein names                                                            | UniProt ID | Degree |
|-----|-----------|--------------------------------------------------------------------------|------------|--------|
| 493 | HDAC1     | Histone deacetylase 1                                                    | Q13547     | 1      |
| 494 | HDAC8     | Histone deacetylase 8                                                    | Q9BY41     | 1      |
| 495 | CBX7      | Chromobox protein homolog 7                                              | O95931     | 1      |
| 496 | PRLR      | Prolactin receptor                                                       | P16471     | 1      |
| 497 | MEN1      | Menin                                                                    | O00255     | 1      |
| 498 | ST3GAL1   | CMP-N-acetylneuraminate-beta-galactosamide-alpha-2,3-sialyltransferase 1 | Q11201     | 1      |
| 499 | IDE       | Insulin-degrading enzyme                                                 | P14735     | 1      |
| 500 | MC3R      | Melanocortin receptor 3                                                  | P41968     | 1      |
| 501 | MC5R      | Melanocortin receptor 5                                                  | P33032     | 1      |
| 502 | C3AR1     | C3a anaphylatoxin chemotactic receptor                                   | Q16581     | 1      |
| 503 | MC4R      | Melanocortin receptor 4                                                  | P32245     | 1      |
| 504 | DDO       | D-aspartate oxidase                                                      | Q99489     | 1      |
| 505 | CYP2A6    | Cytochrome P450 2A6                                                      | P11509     | 1      |
| 506 | PABPC1    | Polyadenylate-binding protein 1                                          | P11940     | 1      |
| 507 | BRD3      | Bromodomain-containing protein 3                                         | Q15059     | 1      |
| 508 | BRDT      | Bromodomain testis-specific protein                                      | Q58F21     | 1      |
| 509 | BRD2      | Bromodomain-containing protein 2                                         | P25440     | 1      |
| 510 | PNP       | Purine nucleoside phosphorylase                                          | P00491     | 1      |
| 511 | GDA       | Guanine deaminase                                                        | Q9Y2T3     | 1      |
| 512 | PTK2B     | Protein-tyrosine kinase 2-beta                                           | Q14289     | 1      |
| 513 | CDK4      | Cyclin-dependent kinase 4                                                | P11802     | 1      |
| 514 | FLT4      | Vascular endothelial growth factor receptor 3                            | P35916     | 1      |
| 515 | GPR35     | G-protein coupled receptor 35                                            | Q9HC97     | 1      |
| 516 | GNRHR     | Gonadotropin-releasing hormone receptor                                  | P30968     | 1      |
| 517 | LSS       | Lanosterol synthase                                                      | P48449     | 1      |
| 518 | BLM       | Bloom syndrome protein                                                   | P54132     | 1      |
| 519 | TYMS      | Thymidylate synthase                                                     | P04818     | 1      |
| 520 | TRIM24    | Transcription intermediary factor 1-alpha                                | O15164     | 1      |
| 521 | SCARB1    | Scavenger receptor class B member 1                                      | Q8WTV0     | 1      |
| 522 | ROCK1     | Rho-associated protein kinase 1                                          | Q13464     | 1      |
| 523 | LIMK1     | LIM domain kinase 1                                                      | P53667     | 1      |
| 524 | CTSS      | Cathepsin S                                                              | P25774     | 1      |
| 525 | IDH1      | Isocitrate dehydrogenase [NADP] cytoplasmic                              | O75874     | 1      |
| 526 | APOB      | Apolipoprotein B-100                                                     | P04114     | 1      |
| 527 | MTTP      | Microsomal triglyceride transfer protein large subunit                   | P55157     | 1      |
| 528 | PANK3     | Pantothenate kinase 3                                                    | Q9H999     | 1      |
| 529 | PFKFB3    | 6-phosphofructo-2-kinase/fructose-2,6-bisphosphatase 3                   | Q16875     | 1      |
| 530 | DHFR      | Dihydrofolate reductase                                                  | P00374     | 1      |
| 531 | NLRP3     | NACHT, LRR and PYD domains-containing protein 3                          | Q96P20     | 1      |
| 532 | ACACB     | Acetyl-CoA carboxylase 2                                                 | O00763     | 1      |
| 533 | CALCRL    | Calcitonin gene-related peptide type 1 receptor                          | Q16602     | 1      |
| 534 | HRH2      | Histamine H2 receptor                                                    | P25021     | 1      |
| 535 | EPHA1     | Ephrin type-A receptor 1                                                 | P21709     | 1      |
| 536 | EPHB1     | Ephrin type-B receptor 1                                                 | P54762     | 1      |
| 537 | EPHA3     | Ephrin type-A receptor 3                                                 | P29320     | 1      |

**Supplementary Table S2: Information on potential targets**

| No. | Gene name | Protein names                                                    | UniProt ID | Degree |
|-----|-----------|------------------------------------------------------------------|------------|--------|
| 538 | EPHB3     | Ephrin type-B receptor 3                                         | P54753     | 1      |
| 539 | EPHA7     | Ephrin type-A receptor 7                                         | Q15375     | 1      |
| 540 | EPHA6     | Ephrin type-A receptor 6                                         | Q9UF33     | 1      |
| 541 | EPHA8     | Ephrin type-A receptor 8                                         | P29322     | 1      |
| 542 | EPHA4     | Ephrin type-A receptor 4                                         | P54764     | 1      |
| 543 | EPHA5     | Ephrin type-A receptor 5                                         | P54756     | 1      |
| 544 | EPHB2     | Ephrin type-B receptor 2                                         | P29323     | 1      |
| 545 | EPHA2     | Ephrin type-A receptor 2                                         | P29317     | 1      |
| 546 | ERAP2     | Endoplasmic reticulum aminopeptidase 2                           | Q6P179     | 1      |
| 547 | GRK6      | G protein-coupled receptor kinase 6                              | P43250     | 1      |
| 548 | RPA1      | Replication protein A 70 kDa DNA-binding subunit                 | P27694     | 1      |
| 549 | ADH1A     | Alcohol dehydrogenase 1A                                         | P07327     | 1      |
| 550 | ABAT      | 4-aminobutyrate aminotransferase, mitochondrial                  | P80404     | 1      |
| 551 | ABCC2     | Canalicular multispecific organic anion transporter 1            | Q92887     | 1      |
| 552 | MAP2K4    | Dual specificity mitogen-activated protein kinase kinase 4       | P45985     | 1      |
| 553 | PSMG1     | Proteasome assembly chaperone 1                                  | O95456     | 1      |
| 554 | ADCYAP1   | Pituitary adenylate cyclase-activating polypeptide               | P18509     | 1      |
| 555 | CASP1     | Caspase-1                                                        | P29466     | 1      |
| 556 | APOD      | Apolipoprotein D                                                 | P05090     | 1      |
| 557 | NOX5      | NADPH oxidase 5                                                  | Q96PH1     | 1      |
| 558 | TDRD7     | Tudor domain-containing protein 7                                | Q8NHU6     | 1      |
| 559 | NFATC1    | Nuclear factor of activated T-cells, cytoplasmic 1               | O95644     | 1      |
| 560 | CYCS      | Cytochrome c                                                     | P99999     | 1      |
| 561 | FOSL2     | Fos-related antigen 2                                            | P15408     | 1      |
| 562 | FOSL1     | Fos-related antigen 1                                            | P15407     | 1      |
| 563 | PRKCD     | Protein kinase C delta type                                      | Q05655     | 1      |
| 564 | TEP1      | Telomerase protein component 1                                   | Q99973     | 1      |
| 565 | FASLG     | Tumor necrosis factor ligand superfamily member 6                | P48023     | 1      |
| 566 | ADCY2     | Adenylate cyclase type 2                                         | Q08462     | 1      |
| 567 | NUF2      | Kinetochore protein Nuf2                                         | Q9BZD4     | 1      |
| 568 | TYR       | Tyrosinase                                                       | P14679     | 1      |
| 569 | MDM2      | E3 ubiquitin-protein ligase Mdm2                                 | Q00987     | 1      |
| 570 | HSD3B1    | 3 beta-hydroxysteroid dehydrogenase/Delta 5-->4-isomerase type 1 | P14060     | 1      |
| 571 | HSD3B2    | 3 beta-hydroxysteroid dehydrogenase/Delta 5-->4-isomerase type 2 | P26439     | 1      |
| 572 | ATP5F1B   | ATP synthase subunit beta, mitochondrial                         | P06576     | 1      |
| 573 | RXRB      | Retinoic acid receptor RXR-beta                                  | P28702     | 1      |
| 574 | ADORA1    | Adenosine receptor A1                                            | P30542     | 1      |
| 575 | PDE5A     | cGMP-specific 3',5'-cyclic phosphodiesterase                     | O76074     | 1      |
| 576 | CD38      | ADP-ribosyl cyclase/cyclic ADP-ribose hydrolase 1                | P28907     | 1      |
| 577 | RPS6KA3   | Ribosomal protein S6 kinase alpha-3                              | P51812     | 1      |
| 578 | XDH       | Xanthine dehydrogenase/oxidase [Includes: Xanthine dehydrogenase | P47989     | 1      |
| 579 | CA2       | Carbonic anhydrase 2                                             | P00918     | 1      |
| 580 | NOX4      | NADPH oxidase 4                                                  | Q9NPH5     | 1      |
| 581 | CA4       | Carbonic anhydrase 4                                             | P22748     | 1      |

**Supplementary Table S2: Information on potential targets**

| No. | Gene name | Protein names                                                      | UniProt ID | Degree |
|-----|-----------|--------------------------------------------------------------------|------------|--------|
| 582 | CA7       | Carbonic anhydrase 7                                               | P43166     | 1      |
| 583 | AKR1B1    | Aldo-keto reductase family 1 member B1                             | P15121     | 1      |
| 584 | NMUR2     | Neuromedin-U receptor 2                                            | Q9GZQ4     | 1      |
| 585 | CES2      | Cocaine esterase                                                   | O00748     | 1      |
| 586 | ABCG2     | Broad substrate specificity ATP-binding cassette transporter ABCG2 | Q9UNQ0     | 1      |
| 587 | MERTK     | Tyrosine-protein kinase Mer                                        | Q12866     | 1      |
| 588 | PLA2G10   | Group 10 secretory phospholipase A2                                | O15496     | 1      |
| 589 | ELANE     | Neutrophil elastase                                                | P08246     | 1      |
| 590 | CES1      | Liver carboxylesterase 1                                           | P23141     | 1      |
| 591 | BCHE      | Cholinesterase                                                     | P06276     | 1      |
| 592 | DCTPP1    | dCTP pyrophosphatase 1                                             | Q9H773     | 1      |
| 593 | TGM2      | Protein-glutamine gamma-glutamyltransferase 2                      | P21980     | 1      |
| 594 | PTPRC     | Receptor-type tyrosine-protein phosphatase C                       | P08575     | 1      |
| 595 | PDE7B     | cAMP-specific 3',5'-cyclic phosphodiesterase 7B                    | Q9NP56     | 1      |
| 596 | PDE4D     | cAMP-specific 3',5'-cyclic phosphodiesterase 4D                    | Q08499     | 1      |
| 597 | PDE4B     | cAMP-specific 3',5'-cyclic phosphodiesterase 4B                    | Q07343     | 1      |
| 598 | PDE7A     | High affinity cAMP-specific 3',5'-cyclic phosphodiesterase 7A      | Q13946     | 1      |
| 599 | MMP8      | Neutrophil collagenase                                             | P22894     | 1      |
| 600 | MMP13     | Collagenase 3                                                      | P45452     | 1      |
| 601 | CACNA1S   | Voltage-dependent L-type calcium channel subunit alpha-1S          | Q13698     | 1      |
| 602 | MMP10     | Stromelysin-2                                                      | P09238     | 1      |
| 603 | SLC29A1   | Equilibrative nucleoside transporter 1                             | Q99808     | 1      |
| 604 | IMPDH1    | Inosine-5'-monophosphate dehydrogenase 1                           | P20839     | 1      |
| 605 | MAPK15    | Mitogen-activated protein kinase 15                                | Q8TD08     | 1      |
| 606 | CDK3      | Cyclin-dependent kinase 3                                          | Q00526     | 1      |
| 607 | CLK3      | Dual specificity protein kinase CLK3                               | P49761     | 1      |
| 608 | TTK       | Dual specificity protein kinase TTK                                | P33981     | 1      |
| 609 | STK16     | Serine/threonine-protein kinase 16                                 | O75716     | 1      |
| 610 | PLK4      | Serine/threonine-protein kinase PLK4                               | O00444     | 1      |
| 611 | CDK9      | Cyclin-dependent kinase 9                                          | P50750     | 1      |
| 612 | ACVRL1    | Serine/threonine-protein kinase receptor R3                        | P37023     | 1      |
| 613 | MAP3K14   | Mitogen-activated protein kinase kinase kinase 14                  | Q99558     | 1      |
| 614 | PRF1      | Perforin-1                                                         | P14222     | 1      |
| 615 | CCNT1     | Cyclin-T1                                                          | O60563     | 1      |
| 616 | F9        | Coagulation factor IX                                              | P00740     | 1      |
| 617 | ABCB11    | Bile salt export pump                                              | O95342     | 1      |
| 618 | CYP2C9    | Cytochrome P450 2C9                                                | P11712     | 1      |
| 619 | RHO       | Rhodopsin                                                          | P08100     | 1      |
| 620 | PSP-I     | porcine seminal protein I                                          | 396818     | 1      |

**Supplementary Table S3: The Drug-Disease targets**

| No. | Gene name | Protein names                                        | UniProt ID | Degree |
|-----|-----------|------------------------------------------------------|------------|--------|
| 1   | PTGS2     | Prostaglandin G/H synthase 2                         | P35354     | 103    |
| 2   | NCOA2     | Nuclear receptor coactivator 2                       | Q15596     | 86     |
| 3   | PGR       | Progesterone receptor                                | P06401     | 75     |
| 4   | PTGS1     | Prostaglandin G/H synthase 1                         | P23219     | 70     |
| 5   | PPARG     | Peroxisome proliferator-activated receptor gamma     | P37231     | 49     |
| 6   | SCN5A     | Sodium channel protein type 5 subunit alpha          | Q14524     | 46     |
| 7   | ADRB2     | Beta-2 adrenergic receptor                           | P07550     | 45     |
| 8   | NR3C2     | Mineralocorticoid receptor                           | P08235     | 44     |
| 9   | GABRA1    | Gamma-aminobutyric acid receptor subunit alpha-1     | P14867     | 44     |
| 10  | PRSS1     | Trypsin-1                                            | P07477     | 44     |
| 11  | RXRA      | Retinoic acid receptor RXR-alpha                     | P19793     | 40     |
| 12  | CHRM1     | Muscarinic acetylcholine receptor M1                 | P11229     | 38     |
| 13  | AR        | Androgen receptor                                    | P10275     | 38     |
| 14  | ACHE      | Acetylcholinesterase                                 | P22303     | 36     |
| 15  | NOS2      | Nitric oxide synthase, inducible                     | P35228     | 34     |
| 16  | ADRA1B    | Alpha-1B adrenergic receptor                         | P35368     | 32     |
| 17  | KCNH2     | Potassium voltage-gated channel subfamily H member 2 | Q12809     | 32     |
| 18  | CHRM3     | Muscarinic acetylcholine receptor M3                 | P20309     | 29     |
| 19  | CHRM2     | Muscarinic acetylcholine receptor M2                 | P08172     | 28     |
| 20  | ESR2      | Estrogen receptor beta                               | Q92731     | 28     |
| 21  | CASP3     | Caspase-3                                            | P42574     | 27     |
| 22  | ESR1      | Estrogen receptor                                    | P03372     | 26     |
| 23  | BCL2      | Apoptosis regulator Bcl-2                            | P10415     | 26     |
| 24  | F7        | Coagulation factor VII                               | P08709     | 25     |
| 25  | JUN       | Transcription factor AP-1                            | P05412     | 23     |
| 26  | BAX       | Apoptosis regulator BAX                              | Q07812     | 23     |
| 27  | GSK3B     | Glycogen synthase kinase-3 beta                      | P49841     | 22     |
| 28  | RELA      | Transcription factor p65                             | Q04206     | 22     |
| 29  | MAOB      | Amine oxidase [flavin-containing] B                  | P27338     | 22     |
| 30  | SLC6A2    | Sodium-dependent noradrenaline transporter           | P23975     | 20     |
| 31  | ADRA1A    | Alpha-1A adrenergic receptor                         | P35348     | 19     |
| 32  | NCOA1     | Nuclear receptor coactivator 1                       | Q15788     | 19     |
| 33  | MMP9      | Matrix metalloproteinase-9                           | P14780     | 19     |
| 34  | PLAU      | Urokinase-type plasminogen activator                 | P00749     | 19     |
| 35  | AKT1      | RAC-alpha serine/threonine-protein kinase            | P31749     | 19     |
| 36  | PPARD     | Peroxisome proliferator-activated receptor delta     | Q03181     | 18     |
| 37  | TNF       | Tumor necrosis factor                                | P01375     | 18     |
| 38  | MMP1      | Interstitial collagenase                             | P03956     | 17     |
| 39  | CASP9     | Caspase-9                                            | P55211     | 17     |
| 40  | NR3C1     | Glucocorticoid receptor                              | P04150     | 16     |
| 41  | CHEK1     | Serine/threonine-protein kinase Chk1                 | Q14757     | 16     |
| 42  | PPARA     | Peroxisome proliferator-activated receptor alpha     | Q07869     | 16     |
| 43  | INSR      | Insulin receptor                                     | P06213     | 16     |
| 44  | NR1I3     | Nuclear receptor subfamily 1 group I member 3        | Q14994     | 16     |
| 45  | MPO       | Myeloperoxidase                                      | P05164     | 16     |

**Supplementary Table S3: The Drug-Disease targets**

| No. | Gene name | Protein names                                                     | UniProt ID | Degree |
|-----|-----------|-------------------------------------------------------------------|------------|--------|
| 46  | HMOX1     | Heme oxygenase 1                                                  | P09601     | 16     |
| 47  | CASP8     | Caspase-8                                                         | Q14790     | 16     |
| 48  | SLC6A4    | Sodium-dependent serotonin transporter                            | P31645     | 15     |
| 49  | SLC2A4    | Solute carrier family 2, facilitated glucose transporter member 4 | P14672     | 15     |
| 50  | GSTP1     | Glutathione S-transferase P                                       | P09211     | 15     |
| 51  | TP53      | Cellular tumor antigen p53                                        | P04637     | 15     |
| 52  | IL6       | Interleukin-6                                                     | P05231     | 15     |
| 53  | SERPINA6  | Corticosteroid-binding globulin                                   | P08185     | 14     |
| 54  | SLC6A3    | Sodium-dependent dopamine transporter                             | Q01959     | 14     |
| 55  | OPRM1     | Mu-type opioid receptor                                           | P35372     | 14     |
| 56  | GSTM2     | Glutathione S-transferase Mu 2                                    | P28161     | 14     |
| 57  | PON1      | Serum paraoxonase/arylesterase 1                                  | P27169     | 14     |
| 58  | AHR       | Aryl hydrocarbon receptor                                         | P35869     | 14     |
| 59  | NR1I2     | Nuclear receptor subfamily 1 group I member 2                     | O75469     | 14     |
| 60  | ICAM1     | Intercellular adhesion molecule 1                                 | P05362     | 14     |
| 61  | CYP1A2    | Cytochrome P450 1A2                                               | P05177     | 14     |
| 62  | CYP3A4    | Cytochrome P450 3A4                                               | P08684     | 14     |
| 63  | PRKCA     | Protein kinase C alpha type                                       | P17252     | 14     |
| 64  | AHSA1     | Activator of 90 kDa heat shock protein ATPase homolog 1           | O95433     | 14     |
| 65  | CDKN1A    | Cyclin-dependent kinase inhibitor 1                               | P38936     | 14     |
| 66  | VEGFA     | Vascular endothelial growth factor A                              | P15692     | 14     |
| 67  | AKR1B10   | Aldo-keto reductase family 1 member B10                           | O60218     | 13     |
| 68  | ADRB1     | Beta-1 adrenergic receptor                                        | P08588     | 13     |
| 69  | ADRA2A    | Alpha-2A adrenergic receptor                                      | P08913     | 13     |
| 70  | ADH1C     | Alcohol dehydrogenase 1C                                          | P00326     | 13     |
| 71  | CCNA2     | Cyclin-A2                                                         | P20248     | 13     |
| 72  | GSTM1     | Glutathione S-transferase Mu 1                                    | P09488     | 13     |
| 73  | DIO1      | Type I iodothyronine deiodinase                                   | P49895     | 13     |
| 74  | PSMD3     | 26S proteasome non-ATPase regulatory subunit 3                    | O43242     | 13     |
| 75  | HAS2      | Hyaluronan synthase 2                                             | Q92819     | 13     |
| 76  | CYP1B1    | Cytochrome P450 1B1                                               | Q16678     | 13     |
| 77  | VCAM1     | Vascular cell adhesion protein 1                                  | P19320     | 13     |
| 78  | SELE      | E-selectin                                                        | P16581     | 13     |
| 79  | CYP1A1    | Cytochrome P450 1A1                                               | P04798     | 13     |
| 80  | STAT1     | Signal transducer and activator of transcription 1-alpha/beta     | P42224     | 13     |
| 81  | EGFR      | Epidermal growth factor receptor                                  | P00533     | 13     |
| 82  | PTGES     | Prostaglandin E synthase                                          | O14684     | 12     |
| 83  | BACE1     | Beta-secretase 1                                                  | P56817     | 12     |
| 84  | MAPK14    | Mitogen-activated protein kinase 14                               | Q16539     | 12     |
| 85  | ODC1      | Ornithine decarboxylase                                           | P11926     | 12     |
| 86  | MAPK1     | Mitogen-activated protein kinase 1                                | P28482     | 12     |
| 87  | MMP2      | 72 kDa type IV collagenase                                        | P08253     | 12     |
| 88  | CCND1     | G1/S-specific cyclin-D1                                           | P24385     | 12     |
| 89  | KDR       | Vascular endothelial growth factor receptor 2                     | P35968     | 11     |

**Supplementary Table S3: The Drug-Disease targets**

| No. | Gene name | Protein names                               | UniProt ID | Degree |
|-----|-----------|---------------------------------------------|------------|--------|
| 90  | CD40LG    | CD40 ligand                                 | P29965     | 11     |
| 91  | NCF1      | Neutrophil cytosol factor 1                 | P14598     | 11     |
| 92  | TOP2A     | DNA topoisomerase 2-alpha                   | P11388     | 11     |
| 93  | IFNG      | Interferon gamma                            | P01579     | 11     |
| 94  | SERPINE1  | Plasminogen activator inhibitor 1           | P05121     | 11     |
| 95  | CCNB1     | G2/mitotic-specific cyclin-B1               | P14635     | 11     |
| 96  | IL2       | Interleukin-2                               | P60568     | 11     |
| 97  | CXCL8     | Interleukin-8                               | P10145     | 11     |
| 98  | CCL2      | C-C motif chemokine 2                       | P13500     | 11     |
| 99  | MYC       | Myc proto-oncogene protein                  | P01106     | 11     |
| 100 | ERBB2     | Receptor tyrosine-protein kinase erbB-2     | P04626     | 11     |
| 101 | HIF1A     | Hypoxia-inducible factor 1-alpha            | Q16665     | 11     |
| 102 | NFKBIA    | NF-kappa-B inhibitor alpha                  | P25963     | 11     |
| 103 | RB1       | Retinoblastoma-associated protein           | P06400     | 11     |
| 104 | EGF       | Pro-epidermal growth factor                 | P01133     | 11     |
| 105 | FOS       | Proto-oncogene c-Fos                        | P01100     | 11     |
| 106 | GRM5      | Metabotropic glutamate receptor 5           | P41594     | 10     |
| 107 | IGF2      | Insulin-like growth factor II               | P01344     | 10     |
| 108 | CTSD      | Cathepsin D                                 | P07339     | 10     |
| 109 | E2F1      | Transcription factor E2F1                   | Q01094     | 10     |
| 110 | CXCL10    | C-X-C motif chemokine 10                    | P02778     | 10     |
| 111 | CXCL2     | C-X-C motif chemokine 2                     | P19875     | 10     |
| 112 | PARP1     | Poly [ADP-ribose] polymerase 1              | P09874     | 10     |
| 113 | NFE2L2    | Nuclear factor erythroid 2-related factor 2 | Q16236     | 10     |
| 114 | PLAT      | Tissue-type plasminogen activator           | P00750     | 10     |
| 115 | NOS3      | Nitric oxide synthase, endothelial          | P29474     | 10     |
| 116 | BIRC5     | Baculoviral IAP repeat-containing protein 5 | O15392     | 10     |
| 117 | PRKCB     | Protein kinase C beta type                  | P05771     | 10     |
| 118 | PTGER3    | Prostaglandin E2 receptor EP3 subtype       | P43115     | 10     |
| 119 | IL1B      | Interleukin-1 beta                          | P01584     | 10     |
| 120 | GJA1      | Gap junction alpha-1 protein                | P17302     | 10     |
| 121 | F3        | Tissue factor                               | P13726     | 10     |
| 122 | CAV1      | Caveolin-1                                  | Q03135     | 10     |
| 123 | ACACA     | Acetyl-CoA carboxylase 1                    | Q13085     | 10     |
| 124 | SOD1      | Superoxide dismutase [Cu-Zn]                | P00441     | 10     |
| 125 | TOP1      | DNA topoisomerase 1                         | P11387     | 10     |
| 126 | IL10      | Interleukin-10                              | P22301     | 10     |
| 127 | EIF6      | Eukaryotic translation initiation factor 6  | P56537     | 10     |
| 128 | BCL2L1    | Bcl-2-like protein 1                        | Q07817     | 10     |
| 129 | ADRA1D    | Alpha-1D adrenergic receptor                | P25100     | 9      |
| 130 | CHRM5     | Muscarinic acetylcholine receptor M5        | P08912     | 9      |
| 131 | MET       | Hepatocyte growth factor receptor           | P08581     | 9      |
| 132 | RASA1     | Ras GTPase-activating protein 1             | P20936     | 9      |
| 133 | HK2       | Hexokinase-2                                | P52789     | 9      |
| 134 | NPEPPS    | Puromycin-sensitive aminopeptidase          | P55786     | 9      |

**Supplementary Table S3: The Drug-Disease targets**

| No. | Gene name | Protein names                                               | UniProt ID | Degree |
|-----|-----------|-------------------------------------------------------------|------------|--------|
| 135 | PCOLCE    | Procollagen C-endopeptidase enhancer 1                      | Q15113     | 9      |
| 136 | ERBB3     | Receptor tyrosine-protein kinase erbB-3                     | P21860     | 9      |
| 137 | IRF1      | Interferon regulatory factor 1                              | P10914     | 9      |
| 138 | IGFBP3    | Insulin-like growth factor-binding protein 3                | P17936     | 9      |
| 139 | ACP3      | Prostatic acid phosphatase                                  | P15309     | 9      |
| 140 | E2F2      | Transcription factor E2F2                                   | Q14209     | 9      |
| 141 | RASSF1    | Ras association domain-containing protein 1                 | Q9NS23     | 9      |
| 142 | RUNX2     | Runt-related transcription factor 2                         | Q13950     | 9      |
| 143 | SPP1      | Osteopontin                                                 | P10451     | 9      |
| 144 | CHUK      | Inhibitor of nuclear factor kappa-B kinase subunit alpha    | O15111     | 9      |
| 145 | HSF1      | Heat shock factor protein 1                                 | Q00613     | 9      |
| 146 | CLDN4     | Claudin-4                                                   | O14493     | 9      |
| 147 | CHEK2     | Serine/threonine-protein kinase Chk2                        | O96017     | 9      |
| 148 | DCAF5     | DDB1- and CUL4-associated factor 5                          | Q96JK2     | 9      |
| 149 | CXCL11    | C-X-C motif chemokine 11                                    | O14625     | 9      |
| 150 | IL1A      | Interleukin-1 alpha                                         | P01583     | 9      |
| 151 | THBD      | Thrombomodulin                                              | P07204     | 9      |
| 152 | HSPB1     | Heat shock protein beta-1                                   | P04792     | 9      |
| 153 | DUOX2     | Dual oxidase 2                                              | Q9NRD8     | 9      |
| 154 | RUNX1T1   | Protein CBFA2T1                                             | Q06455     | 9      |
| 155 | RAF1      | RAF proto-oncogene serine/threonine-protein kinase          | P04049     | 9      |
| 156 | POR       | NADPH--cytochrome P450 reductase                            | P16435     | 9      |
| 157 | ELK1      | ETS domain-containing protein Elk-1                         | P19419     | 9      |
| 158 | MMP3      | Stromelysin-1                                               | P08254     | 9      |
| 159 | OPRD1     | Delta-type opioid receptor                                  | P41143     | 8      |
| 160 | ANPEP     | Aminopeptidase N                                            | P15144     | 8      |
| 161 | CTSK      | Cathepsin K                                                 | P43235     | 7      |
| 162 | F2R       | Proteinase-activated receptor 1                             | P25116     | 7      |
| 163 | RORA      | Nuclear receptor ROR-alpha                                  | P35398     | 7      |
| 164 | JAK2      | Tyrosine-protein kinase JAK2                                | O60674     | 7      |
| 165 | MTOR      | Serine/threonine-protein kinase mTOR                        | P42345     | 7      |
| 166 | LTA4H     | Leukotriene A-4 hydrolase                                   | P09960     | 7      |
| 167 | GPBAR1    | G-protein coupled bile acid receptor 1                      | Q8TDU6     | 6      |
| 168 | FFAR1     | Free fatty acid receptor 1                                  | O14842     | 6      |
| 169 | HRH3      | Histamine H3 receptor                                       | Q9Y5N1     | 6      |
| 170 | MCL1      | Induced myeloid leukemia cell differentiation protein Mcl-1 | Q07820     | 6      |
| 171 | ADRA2C    | Alpha-2C adrenergic receptor                                | P18825     | 6      |
| 172 | ADRA2B    | Alpha-2B adrenergic receptor                                | P18089     | 6      |
| 173 | G6PD      | Glucose-6-phosphate 1-dehydrogenase                         | P11413     | 6      |
| 174 | KDM4C     | Lysine-specific demethylase 4C                              | Q9H3R0     | 6      |
| 175 | GRM7      | Metabotropic glutamate receptor 7                           | Q14831     | 6      |
| 176 | GRM8      | Metabotropic glutamate receptor 8                           | O00222     | 6      |
| 177 | GRM4      | Metabotropic glutamate receptor 4                           | Q14833     | 6      |
| 178 | CTRB1     | Chymotrypsinogen B                                          | P17538     | 6      |
| 179 | MAOA      | Amine oxidase [flavin-containing] A                         | P21397     | 6      |

**Supplementary Table S3: The Drug-Disease targets**

| No. | Gene name | Protein names                                                           | UniProt ID | Degree |
|-----|-----------|-------------------------------------------------------------------------|------------|--------|
| 180 | MAP2      | Microtubule-associated protein 2                                        | P11137     | 6      |
| 181 | HSD17B1   | Estradiol 17-beta-dehydrogenase 1                                       | P14061     | 5      |
| 182 | UGT2B7    | UDP-glucuronosyltransferase 2B7                                         | P16662     | 5      |
| 183 | STS       | Steryl-sulfatase                                                        | P08842     | 5      |
| 184 | CDK1      | Cyclin-dependent kinase 1                                               | P06493     | 5      |
| 185 | HRH4      | Histamine H4 receptor                                                   | Q9H3N8     | 5      |
| 186 | HDAC3     | Histone deacetylase 3                                                   | O15379     | 5      |
| 187 | PLG       | Plasminogen                                                             | P00747     | 5      |
| 188 | EGLN1     | Egl nine homolog 1                                                      | Q9GZT9     | 5      |
| 189 | TERT      | Telomerase reverse transcriptase                                        | O14746     | 5      |
| 190 | MGLL      | Monoglyceride lipase                                                    | Q99685     | 5      |
| 191 | OAT       | Ornithine aminotransferase, mitochondrial                               | P04181     | 5      |
| 192 | MAP2K1    | Dual specificity mitogen-activated protein kinase kinase 1              | Q02750     | 5      |
| 193 | REN       | Renin                                                                   | P00797     | 5      |
| 194 | POLB      | DNA polymerase beta                                                     | P06746     | 5      |
| 195 | PEPD      | Xaa-Pro dipeptidase                                                     | P12955     | 5      |
| 196 | SLC1A2    | Excitatory amino acid transporter 2                                     | P43004     | 5      |
| 197 | GRM6      | Metabotropic glutamate receptor 6                                       | O15303     | 5      |
| 198 | GRM1      | Metabotropic glutamate receptor 1                                       | Q13255     | 5      |
| 199 | GRM3      | Metabotropic glutamate receptor 3                                       | Q14832     | 5      |
| 200 | IKBKB     | Inhibitor of nuclear factor kappa-B kinase subunit beta                 | O14920     | 5      |
| 201 | JAK1      | Tyrosine-protein kinase JAK1                                            | P23458     | 4      |
| 202 | ROCK2     | Rho-associated protein kinase 2                                         | O75116     | 4      |
| 203 | CD81      | CD81 antigen                                                            | P60033     | 4      |
| 204 | KMO       | Kynurenine 3-monooxygenase                                              | O15229     | 4      |
| 205 | PLA2G4A   | Cytosolic phospholipase A2                                              | P47712     | 4      |
| 206 | HTR3A     | 5-hydroxytryptamine receptor 3A                                         | P46098     | 4      |
| 207 | CRHR1     | Corticotropin-releasing factor receptor 1                               | P34998     | 4      |
| 208 | GLUL      | Glutamine synthetase                                                    | P15104     | 4      |
| 209 | IRAK4     | Interleukin-1 receptor-associated kinase 4                              | Q9NWZ3     | 4      |
| 210 | FGFR1     | Fibroblast growth factor receptor 1                                     | P11362     | 4      |
| 211 | CDK2      | Cyclin-dependent kinase 2                                               | P24941     | 4      |
| 212 | P2RX3     | P2X purinoceptor 3                                                      | P56373     | 4      |
| 213 | SYK       | Tyrosine-protein kinase SYK                                             | P43405     | 4      |
| 214 | SLPI      | Antileukoproteinase                                                     | P03973     | 4      |
| 215 | AKR1C3    | Aldo-keto reductase family 1 member C3                                  | P42330     | 4      |
| 216 | PPP3CA    | Serine/threonine-protein phosphatase 2B catalytic subunit alpha isoform | Q08209     | 4      |
| 217 | MAPK8     | Mitogen-activated protein kinase 8                                      | P45983     | 4      |
| 218 | GRIA2     | Glutamate receptor 2                                                    | P42262     | 4      |
| 219 | SLC22A2   | Solute carrier family 22 member 2                                       | O15244     | 3      |
| 220 | ADCY10    | Adenylate cyclase type 10                                               | Q96PN6     | 3      |
| 221 | GP1R      | G-protein coupled estrogen receptor 1                                   | Q99527     | 3      |
| 222 | HLCS      | Biotin--protein ligase                                                  | P50747     | 3      |
| 223 | PTK2      | Focal adhesion kinase 1                                                 | Q05397     | 3      |
| 224 | SELP      | P-selectin                                                              | P16109     | 3      |



**Supplementary Table S3: The Drug-Disease targets**

| No. | Gene name | Protein names                                                    | UniProt ID | Degree |
|-----|-----------|------------------------------------------------------------------|------------|--------|
| 225 | HDAC6     | Histone deacetylase 6                                            | Q9UBN7     | 3      |
| 226 | TRPA1     | Transient receptor potential cation channel subfamily A member 1 | O75762     | 3      |
| 227 | P2RX7     | P2X purinoceptor 7                                               | Q99572     | 3      |
| 228 | ALK       | ALK tyrosine kinase receptor                                     | Q9UM73     | 3      |
| 229 | LTB4R     | Leukotriene B4 receptor 1                                        | Q15722     | 3      |
| 230 | MMP14     | Matrix metalloproteinase-14                                      | P50281     | 3      |
| 231 | CYP26A1   | Cytochrome P450 26A1                                             | O43174     | 3      |
| 232 | NPY5R     | Neuropeptide Y receptor type 5                                   | Q15761     | 3      |
| 233 | MAP3K5    | Mitogen-activated protein kinase kinase kinase 5                 | Q99683     | 3      |
| 234 | CPT1A     | Carnitine O-palmitoyltransferase 1, liver isoform                | P50416     | 3      |
| 235 | SLC5A1    | Sodium/glucose cotransporter 1                                   | P13866     | 3      |
| 236 | RARA      | Retinoic acid receptor alpha                                     | P10276     | 3      |
| 237 | RARB      | Retinoic acid receptor beta                                      | P10826     | 3      |
| 238 | RARG      | Retinoic acid receptor gamma                                     | P13631     | 3      |
| 239 | CNR2      | Cannabinoid receptor 2                                           | P34972     | 3      |
| 240 | ACP1      | Low molecular weight phosphotyrosine protein phosphatase         | P24666     | 3      |
| 241 | RORC      | Nuclear receptor ROR-gamma                                       | P51449     | 3      |
| 242 | ACE       | Angiotensin-converting enzyme                                    | P12821     | 3      |
| 243 | BBOX1     | Gamma-butyrobetaine dioxygenase                                  | O75936     | 3      |
| 244 | TBXA2R    | Thromboxane A2 receptor                                          | P21731     | 3      |
| 245 | F2        | Prothrombin                                                      | P00734     | 3      |
| 246 | ALPL      | Alkaline phosphatase, tissue-nonspecific isozyme                 | P05186     | 3      |
| 247 | HRH1      | Histamine H1 receptor                                            | P35367     | 3      |
| 248 | PDE10A    | cAMP and cAMP-inhibited cGMP 3',5'-cyclic phosphodiesterase 10A  | Q9Y233     | 3      |
| 249 | MAPKAPK2  | MAP kinase-activated protein kinase 2                            | P49137     | 3      |
| 250 | IMPDH2    | Inosine-5'-monophosphate dehydrogenase 2                         | P12268     | 3      |
| 251 | DYRK1B    | Dual specificity tyrosine-phosphorylation-regulated kinase 1B    | Q9Y463     | 3      |
| 252 | GSK3A     | Glycogen synthase kinase-3 alpha                                 | P49840     | 3      |
| 253 | SLC5A2    | Sodium/glucose cotransporter 2                                   | P31639     | 3      |
| 254 | SORD      | Sorbitol dehydrogenase                                           | Q00796     | 3      |
| 255 | CCR1      | C-C chemokine receptor type 1                                    | P32246     | 3      |
| 256 | AGTR1     | Type-1 angiotensin II receptor                                   | P30556     | 3      |
| 257 | FLT1      | Vascular endothelial growth factor receptor 1                    | P17948     | 3      |
| 258 | PGK1      | Phosphoglycerate kinase 1                                        | P00558     | 3      |
| 259 | CPB1      | Carboxypeptidase B                                               | P15086     | 3      |
| 260 | TAAR1     | Trace amine-associated receptor 1                                | Q96RJ0     | 3      |
| 261 | FASN      | Fatty acid synthase                                              | P49327     | 3      |
| 262 | CCR5      | C-C chemokine receptor type 5                                    | P51681     | 2      |
| 263 | ADRB3     | Beta-3 adrenergic receptor                                       | P13945     | 2      |
| 264 | AHCY      | Adenosylhomocysteinase                                           | P23526     | 2      |
| 265 | MAP3K8    | Mitogen-activated protein kinase kinase kinase 8                 | P41279     | 2      |
| 266 | PARP2     | Poly [ADP-ribose] polymerase 2                                   | Q9UGN5     | 2      |
| 267 | TK1       | Thymidine kinase, cytosolic                                      | P04183     | 2      |

**Supplementary Table S3: The Drug-Disease targets**

| No. | Gene name | Protein names                                        | UniProt ID | Degree |
|-----|-----------|------------------------------------------------------|------------|--------|
| 268 | RPS6KA5   | Ribosomal protein S6 kinase alpha-5                  | O75582     | 2      |
| 269 | TKT       | Transketolase                                        | P29401     | 2      |
| 270 | CFTR      | Cystic fibrosis transmembrane conductance regulator  | P13569     | 2      |
| 271 | ECE1      | Endothelin-converting enzyme 1                       | P42892     | 2      |
| 272 | GZMB      | Granzyme B                                           | P10144     | 2      |
| 273 | ABCC1     | Multidrug resistance-associated protein 1            | P33527     | 2      |
| 274 | CRP       | C-reactive protein [Cleaved into: C-reactive protein | P02741     | 2      |
| 275 | PDGFB     | Platelet-derived growth factor subunit B             | P01127     | 2      |
| 276 | CXCR4     | C-X-C chemokine receptor type 4                      | P61073     | 2      |
| 277 | HDAC2     | Histone deacetylase 2                                | Q92769     | 2      |
| 278 | EPHX1     | Epoxide hydrolase 1                                  | P07099     | 2      |
| 279 | BRD4      | Bromodomain-containing protein 4                     | O60885     | 2      |
| 280 | HCAR2     | Hydroxycarboxylic acid receptor 2                    | Q8TDS4     | 2      |
| 281 | JAK3      | Tyrosine-protein kinase JAK3                         | P52333     | 2      |
| 282 | PDGFRA    | Platelet-derived growth factor receptor alpha        | P16234     | 2      |
| 283 | PDGFRB    | Platelet-derived growth factor receptor beta         | P09619     | 2      |
| 284 | GCGR      | Glucagon receptor                                    | P47871     | 2      |
| 285 | FGFR3     | Fibroblast growth factor receptor 3                  | P22607     | 2      |
| 286 | LIMK2     | LIM domain kinase 2                                  | P53671     | 2      |
| 287 | PREP      | Prolyl endopeptidase                                 | P48147     | 2      |
| 288 | CNR1      | Cannabinoid receptor 1                               | P21554     | 2      |
| 289 | SCD       | Acyl-CoA desaturase                                  | O00767     | 2      |
| 290 | FABP1     | Fatty acid-binding protein, liver                    | P07148     | 2      |
| 291 | KYNU      | Kynureninase                                         | Q16719     | 2      |
| 292 | MIF       | Macrophage migration inhibitory factor               | P14174     | 2      |
| 293 | MME       | Neprilysin                                           | P08473     | 2      |
| 294 | CAT       | Catalase                                             | P04040     | 2      |
| 295 | FN1       | Fibronectin                                          | P02751     | 2      |
| 296 | PCNA      | Proliferating cell nuclear antigen                   | P12004     | 2      |
| 297 | IL4       | Interleukin-4                                        | P05112     | 2      |
| 298 | NQO2      | Ribosyldihyronicotinamide dehydrogenase [quinone]    | P16083     | 2      |
| 299 | ALOX5     | Polyunsaturated fatty acid 5-lipoxygenase            | P09917     | 2      |
| 300 | CASP7     | Caspase-7                                            | P55210     | 2      |
| 301 | CTNNB1    | Catenin beta-1                                       | P35222     | 2      |
| 302 | RNPEP     | Aminopeptidase B                                     | Q9H4A4     | 2      |
| 303 | PLK1      | Serine/threonine-protein kinase PLK1                 | P53350     | 2      |
| 304 | MAPK7     | Mitogen-activated protein kinase 7                   | Q13164     | 2      |
| 305 | CDK7      | Cyclin-dependent kinase 7                            | P50613     | 2      |
| 306 | MCHR1     | Melanin-concentrating hormone receptor 1             | Q99705     | 2      |
| 307 | GRB2      | Growth factor receptor-bound protein 2               | P62993     | 2      |
| 308 | TBXAS1    | Thromboxane-A synthase                               | P24557     | 2      |
| 309 | TYRO3     | Tyrosine-protein kinase receptor TYRO3               | Q06418     | 2      |
| 310 | AXL       | Tyrosine-protein kinase receptor UFO                 | P30530     | 2      |
| 311 | SMO       | Smoothed homolog                                     | Q99835     | 2      |
| 312 | AVPR1A    | Vasopressin V1a receptor                             | P37288     | 2      |

**Supplementary Table S3: The Drug-Disease targets**

| No. | Gene name | Protein names                                                    | UniProt ID | Degree |
|-----|-----------|------------------------------------------------------------------|------------|--------|
| 313 | CFD       | Complement factor D                                              | P00746     | 2      |
| 314 | OLR1      | Oxidized low-density lipoprotein receptor 1                      | P78380     | 2      |
| 315 | PYGM      | Glycogen phosphorylase, muscle form                              | P11217     | 2      |
| 316 | HSP90AA1  | Heat shock protein HSP 90-alpha                                  | P07900     | 1      |
| 317 | CYP2C19   | Cytochrome P450 2C19                                             | P33261     | 1      |
| 318 | ERN1      | Serine/threonine-protein kinase/endoribonuclease IRE1            | O75460     | 1      |
| 319 | HDAC7     | Histone deacetylase 7                                            | Q8WUI4     | 1      |
| 320 | HDAC9     | Histone deacetylase 9                                            | Q9UKV0     | 1      |
| 321 | HDAC5     | Histone deacetylase 5                                            | Q9UQL6     | 1      |
| 322 | STAT6     | Signal transducer and activator of transcription 6               | P42226     | 1      |
| 323 | HDAC4     | Histone deacetylase 4                                            | P56524     | 1      |
| 324 | HSP90AB1  | Heat shock protein HSP 90-beta                                   | P08238     | 1      |
| 325 | ROS1      | Proto-oncogene tyrosine-protein kinase ROS                       | P08922     | 1      |
| 326 | EP300     | Histone acetyltransferase p300                                   | Q09472     | 1      |
| 327 | CCR3      | C-C chemokine receptor type 3                                    | P51677     | 1      |
| 328 | MMP16     | Matrix metalloproteinase-16                                      | P51512     | 1      |
| 329 | ADK       | Adenosine kinase                                                 | P55263     | 1      |
| 330 | CYP27A1   | Sterol 26-hydroxylase, mitochondrial                             | Q02318     | 1      |
| 331 | TTR       | Transthyretin                                                    | P02766     | 1      |
| 332 | MAP3K7    | Mitogen-activated protein kinase kinase kinase 7                 | O43318     | 1      |
| 333 | KCNK2     | Potassium channel subfamily K member 2                           | O95069     | 1      |
| 334 | PTGES2    | Prostaglandin E synthase 2                                       | Q9H7Z7     | 1      |
| 335 | TNFRSF1B  | Tumor necrosis factor receptor superfamily member 1B             | P20333     | 1      |
| 336 | KCNK10    | Potassium channel subfamily K member 10                          | P57789     | 1      |
| 337 | ABCC4     | Multidrug resistance-associated protein 4                        | O15439     | 1      |
| 338 | ABCG1     | ATP-binding cassette sub-family G member 1                       | P45844     | 1      |
| 339 | CETP      | Cholesteryl ester transfer protein                               | P11597     | 1      |
| 340 | C1R       | Complement C1r subcomponent                                      | P00736     | 1      |
| 341 | UCP2      | Mitochondrial uncoupling protein 2                               | P55851     | 1      |
| 342 | ALDH3A1   | Aldehyde dehydrogenase, dimeric NADP-preferring                  | P30838     | 1      |
| 343 | ALDH2     | Aldehyde dehydrogenase, mitochondrial                            | P05091     | 1      |
| 344 | GLB1      | Beta-galactosidase                                               | P16278     | 1      |
| 345 | PECAM1    | Platelet endothelial cell adhesion molecule                      | P16284     | 1      |
| 346 | TNFRSF1A  | Tumor necrosis factor receptor superfamily member 1A             | P19438     | 1      |
| 347 | RXRG      | Retinoic acid receptor RXR-gamma                                 | P48443     | 1      |
| 348 | TRPV1     | Transient receptor potential cation channel subfamily V member 1 | Q8NER1     | 1      |
| 349 | PTPRA     | Receptor-type tyrosine-protein phosphatase alpha                 | P18433     | 1      |
| 350 | THRA      | Thyroid hormone receptor alpha                                   | P10827     | 1      |
| 351 | BHMT2     | S-methylmethionine-homocysteine S-methyltransferase BHMT2        | Q9H2M3     | 1      |
| 352 | HNF4A     | Hepatocyte nuclear factor 4-alpha                                | P41235     | 1      |
| 353 | RORB      | Nuclear receptor ROR-beta                                        | Q92753     | 1      |
| 354 | GLRA1     | Glycine receptor subunit alpha-1                                 | P23415     | 1      |
| 355 | CYP26B1   | Cytochrome P450 26B1                                             | Q9NR63     | 1      |
| 356 | NROB2     | Nuclear receptor subfamily 0 group B member 2                    | Q15466     | 1      |

**Supplementary Table S3: The Drug-Disease targets**

| No. | Gene name | Protein names                                                                   | UniProt ID | Degree |
|-----|-----------|---------------------------------------------------------------------------------|------------|--------|
| 357 | GSTK1     | Glutathione S-transferase kappa 1                                               | Q9Y2Q3     | 1      |
| 358 | HAO1      | Hydroxyacid oxidase 1                                                           | Q9UJM8     | 1      |
| 359 | CPA1      | Carboxypeptidase A1                                                             | P15085     | 1      |
| 360 | ACLY      | ATP-citrate synthase                                                            | P53396     | 1      |
| 361 | SLC13A5   | Solute carrier family 13 member 5                                               | Q86YT5     | 1      |
| 362 | TAGLN2    | Transgelin-2                                                                    | P37802     | 1      |
| 363 | SULF1     | Extracellular sulfatase Sulf-1                                                  | Q8IWU6     | 1      |
| 364 | STIP1     | Stress-induced-phosphoprotein 1                                                 | P31948     | 1      |
| 365 | SLK       | STE20-like serine/threonine-protein kinase                                      | Q9H2G2     | 1      |
| 366 | SLC5A3    | Sodium/myo-inositol cotransporter                                               | P53794     | 1      |
| 367 | SFRP1     | Secreted frizzled-related protein 1                                             | Q8N474     | 1      |
| 368 | SDC4      | Syndecan-4                                                                      | P31431     | 1      |
| 369 | SDC2      | Syndecan-2                                                                      | P34741     | 1      |
| 370 | SDC1      | Syndecan-1                                                                      | P18827     | 1      |
| 371 | S100B     | Protein S100-B                                                                  | P04271     | 1      |
| 372 | S100A1    | Protein S100-A1                                                                 | P23297     | 1      |
| 373 | RAC1      | Ras-related C3 botulinum toxin substrate 1                                      | P63000     | 1      |
| 374 | PXN       | Paxillin                                                                        | P49023     | 1      |
| 375 | PSME1     | Proteasome activator complex subunit 1                                          | Q06323     | 1      |
| 376 | PSMB7     | Proteasome subunit beta type-7                                                  | Q99436     | 1      |
| 377 | PROC      | Vitamin K-dependent protein C                                                   | P04070     | 1      |
| 378 | PPBP      | Platelet basic protein                                                          | P02775     | 1      |
| 379 | PITPNA    | Phosphatidylinositol transfer protein alpha isoform                             | Q00169     | 1      |
| 380 | PDHB      | Pyruvate dehydrogenase E1 component subunit beta, mitochondrial                 | P11177     | 1      |
| 381 | PARK7     | Parkinson disease protein 7                                                     | Q99497     | 1      |
| 382 | NFKB1     | Nuclear factor NF-kappa-B p105 subunit                                          | P19838     | 1      |
| 383 | NFATC3    | Nuclear factor of activated T-cells, cytoplasmic 3                              | Q12968     | 1      |
| 384 | MSN       | Moesin                                                                          | P26038     | 1      |
| 385 | LPL       | Lipoprotein lipase                                                              | P06858     | 1      |
| 386 | LDHB      | L-lactate dehydrogenase B chain                                                 | P07195     | 1      |
| 387 | KRT18     | Keratin, type I cytoskeletal 18                                                 | P05783     | 1      |
| 388 | KLF4      | Krueppel-like factor 4                                                          | O43474     | 1      |
| 389 | ITGAX     | Integrin alpha-X                                                                | P20702     | 1      |
| 390 | HRG       | Histidine-rich glycoprotein                                                     | P04196     | 1      |
| 391 | GATA4     | Transcription factor GATA-4                                                     | P43694     | 1      |
| 392 | FOLR1     | Folate receptor alpha                                                           | P15328     | 1      |
| 393 | FGF8      | Fibroblast growth factor 8                                                      | P55075     | 1      |
| 394 | FGF4      | Fibroblast growth factor 4                                                      | P08620     | 1      |
| 395 | FGF3      | Fibroblast growth factor 3                                                      | P11487     | 1      |
| 396 | FGF10     | Fibroblast growth factor 10                                                     | O15520     | 1      |
| 397 | FGA       | Fibrinogen alpha chain [Cleaved into: Fibrinopeptide A; Fibrinogen alpha chain] | P02671     | 1      |
| 398 | FCGR2A    | Low affinity immunoglobulin gamma Fc region receptor II-a                       | P12318     | 1      |
| 399 | FAS       | Tumor necrosis factor receptor superfamily member 6                             | P25445     | 1      |
| 400 | EGLN3     | Prolyl hydroxylase EGLN3                                                        | Q9H6Z9     | 1      |

**Supplementary Table S3: The Drug-Disease targets**

| No. | Gene name | Protein names                                                                          | UniProt ID | Degree |
|-----|-----------|----------------------------------------------------------------------------------------|------------|--------|
| 401 | DES       | Desmin                                                                                 | P17661     | 1      |
| 402 | DDAH2     | N                                                                                      | O95865     | 1      |
| 403 | CSF3      | Granulocyte colony-stimulating factor                                                  | P09919     | 1      |
| 404 | CR1       | Complement receptor type 1                                                             | P17927     | 1      |
| 405 | COL1A1    | Collagen alpha-1                                                                       | P02452     | 1      |
| 406 | COL18A1   | Collagen alpha-1                                                                       | P39060     | 1      |
| 407 | CASP12    | Inactive caspase-12                                                                    | Q6UXS9     | 1      |
| 408 | CACNA1E   | Voltage-dependent R-type calcium channel subunit alpha-1E                              | Q15878     | 1      |
| 409 | C5        | Complement C5                                                                          | P01031     | 1      |
| 410 | BMPR1A    | Bone morphogenetic protein receptor type-1A                                            | P36894     | 1      |
| 411 | ATP1B1    | Sodium/potassium-transporting ATPase subunit beta-1                                    | P05026     | 1      |
| 412 | APCS      | Serum amyloid P-component                                                              | P02743     | 1      |
| 413 | ANXA6     | Annexin A6                                                                             | P08133     | 1      |
| 414 | AGT       | Angiotensinogen                                                                        | P01019     | 1      |
| 415 | ADAMTS1   | A disintegrin and metalloproteinase with thrombospondin motifs 1                       | Q9UHI8     | 1      |
| 416 | ACKR3     | Atypical chemokine receptor 3                                                          | P25106     | 1      |
| 417 | THBS1     | Thrombospondin-1                                                                       | P07996     | 1      |
| 418 | TFRC      | Transferrin receptor protein 1                                                         | P02786     | 1      |
| 419 | SELL      | L-selectin                                                                             | P14151     | 1      |
| 420 | S100A6    | Protein S100-A6                                                                        | P06703     | 1      |
| 421 | PSMB5     | Proteasome subunit beta type-5                                                         | P28074     | 1      |
| 422 | MAP2K2    | Dual specificity mitogen-activated protein kinase kinase 2                             | P36507     | 1      |
| 423 | ITGAM     | Integrin alpha-M                                                                       | P11215     | 1      |
| 424 | HPSE      | Heparanase                                                                             | Q9Y251     | 1      |
| 425 | GPT       | Alanine aminotransferase 1                                                             | P24298     | 1      |
| 426 | FGF5      | Fibroblast growth factor 5                                                             | P12034     | 1      |
| 427 | FGF19     | Fibroblast growth factor 19                                                            | O95750     | 1      |
| 428 | CXCL12    | Stromal cell-derived factor 1                                                          | P48061     | 1      |
| 429 | CDKN1B    | Cyclin-dependent kinase inhibitor 1B                                                   | P46527     | 1      |
| 430 | CCL11     | Eotaxin                                                                                | P51671     | 1      |
| 431 | ACTA2     | Actin, aortic smooth muscle                                                            | P62736     | 1      |
| 432 | TGFB1     | Transforming growth factor beta-1 proprotein [Cleaved into: Latency-associated peptide | P01137     | 1      |
| 433 | MAPT      | Microtubule-associated protein tau                                                     | P10636     | 1      |
| 434 | FGF23     | Fibroblast growth factor 23                                                            | Q9GZV9     | 1      |
| 435 | C3        | Complement C3                                                                          | P01024     | 1      |
| 436 | BMP6      | Bone morphogenetic protein 6                                                           | P22004     | 1      |
| 437 | FGF7      | Fibroblast growth factor 7                                                             | P21781     | 1      |
| 438 | MAPK3     | Mitogen-activated protein kinase 3                                                     | P27361     | 1      |
| 439 | HGF       | Hepatocyte growth factor                                                               | P14210     | 1      |
| 440 | FGFR4     | Fibroblast growth factor receptor 4                                                    | P22455     | 1      |
| 441 | F10       | Coagulation factor X                                                                   | P00742     | 1      |
| 442 | HAMP      | Hepcidin                                                                               | P81172     | 1      |
| 443 | PF4       | Platelet factor 4                                                                      | P02776     | 1      |
| 444 | APP       | Amyloid-beta precursor protein                                                         | P05067     | 1      |

**Supplementary Table S3: The Drug-Disease targets**

| No. | Gene name | Protein names                                                            | UniProt ID | Degree |
|-----|-----------|--------------------------------------------------------------------------|------------|--------|
| 445 | FGFR2     | Fibroblast growth factor receptor 2                                      | P21802     | 1      |
| 446 | EDN1      | Endothelin-1                                                             | P05305     | 1      |
| 447 | SERPINC1  | Antithrombin-III                                                         | P01008     | 1      |
| 448 | FGF1      | Fibroblast growth factor 1                                               | P05230     | 1      |
| 449 | FGF2      | Fibroblast growth factor 2                                               | P09038     | 1      |
| 450 | P2RY12    | P2Y purinoceptor 12                                                      | Q9H244     | 1      |
| 451 | F2RL3     | Proteinase-activated receptor 4                                          | Q96R10     | 1      |
| 452 | ITGA3     | Integrin alpha-3                                                         | P26006     | 1      |
| 453 | ITGA4     | Integrin alpha-4                                                         | P13612     | 1      |
| 454 | AVPR1B    | Vasopressin V1b receptor                                                 | P47901     | 1      |
| 455 | CHIA      | Acidic mammalian chitinase                                               | Q9BZP6     | 1      |
| 456 | OPRL1     | Nociceptin receptor                                                      | P41146     | 1      |
| 457 | PSMB8     | Proteasome subunit beta type-8                                           | P28062     | 1      |
| 458 | PSMB9     | Proteasome subunit beta type-9                                           | P28065     | 1      |
| 459 | NPY4R     | Neuropeptide Y receptor type 4                                           | P50391     | 1      |
| 460 | OXTR      | Oxytocin receptor                                                        | P30559     | 1      |
| 461 | FURIN     | Furin                                                                    | P09958     | 1      |
| 462 | HDAC11    | Histone deacetylase 11                                                   | Q96DB2     | 1      |
| 463 | HDAC1     | Histone deacetylase 1                                                    | Q13547     | 1      |
| 464 | HDAC8     | Histone deacetylase 8                                                    | Q9BY41     | 1      |
| 465 | CBX7      | Chromobox protein homolog 7                                              | O95931     | 1      |
| 466 | PRLR      | Prolactin receptor                                                       | P16471     | 1      |
| 467 | MEN1      | Menin                                                                    | O00255     | 1      |
| 468 | ST3GAL1   | CMP-N-acetylneuraminase-beta-galactosamide-alpha-2,3-sialyltransferase 1 | Q11201     | 1      |
| 469 | IDE       | Insulin-degrading enzyme                                                 | P14735     | 1      |
| 470 | MC3R      | Melanocortin receptor 3                                                  | P41968     | 1      |
| 471 | MC5R      | Melanocortin receptor 5                                                  | P33032     | 1      |
| 472 | C3AR1     | C3a anaphylatoxin chemotactic receptor                                   | Q16581     | 1      |
| 473 | MC4R      | Melanocortin receptor 4                                                  | P32245     | 1      |
| 474 | CYP2A6    | Cytochrome P450 2A6                                                      | P11509     | 1      |
| 475 | PABPC1    | Polyadenylate-binding protein 1                                          | P11940     | 1      |
| 476 | BRD2      | Bromodomain-containing protein 2                                         | P25440     | 1      |
| 477 | GDA       | Guanine deaminase                                                        | Q9Y2T3     | 1      |
| 478 | PTK2B     | Protein-tyrosine kinase 2-beta                                           | Q14289     | 1      |
| 479 | CDK4      | Cyclin-dependent kinase 4                                                | P11802     | 1      |
| 480 | FLT4      | Vascular endothelial growth factor receptor 3                            | P35916     | 1      |
| 481 | GPR35     | G-protein coupled receptor 35                                            | Q9HC97     | 1      |
| 482 | GNRHR     | Gonadotropin-releasing hormone receptor                                  | P30968     | 1      |
| 483 | LSS       | Lanosterol synthase                                                      | P48449     | 1      |
| 484 | BLM       | Bloom syndrome protein                                                   | P54132     | 1      |
| 485 | TYMS      | Thymidylate synthase                                                     | P04818     | 1      |
| 486 | TRIM24    | Transcription intermediary factor 1-alpha                                | O15164     | 1      |
| 487 | SCARB1    | Scavenger receptor class B member 1                                      | Q8WTV0     | 1      |
| 488 | ROCK1     | Rho-associated protein kinase 1                                          | Q13464     | 1      |
| 489 | LIMK1     | LIM domain kinase 1                                                      | P53667     | 1      |

**Supplementary Table S3: The Drug-Disease targets**

| No. | Gene name | Protein names                                                    | UniProt ID | Degree |
|-----|-----------|------------------------------------------------------------------|------------|--------|
| 490 | CTSS      | Cathepsin S                                                      | P25774     | 1      |
| 491 | IDH1      | Isocitrate dehydrogenase [NADP] cytoplasmic                      | O75874     | 1      |
| 492 | APOB      | Apolipoprotein B-100                                             | P04114     | 1      |
| 493 | MTTP      | Microsomal triglyceride transfer protein large subunit           | P55157     | 1      |
| 494 | PANK3     | Pantothenate kinase 3                                            | Q9H999     | 1      |
| 495 | PFKFB3    | 6-phosphofructo-2-kinase/fructose-2,6-bisphosphatase 3           | Q16875     | 1      |
| 496 | DHFR      | Dihydrofolate reductase                                          | P00374     | 1      |
| 497 | NLRP3     | NACHT, LRR and PYD domains-containing protein 3                  | Q96P20     | 1      |
| 498 | ACACB     | Acetyl-CoA carboxylase 2                                         | O00763     | 1      |
| 499 | CALCRL    | Calcitonin gene-related peptide type 1 receptor                  | Q16602     | 1      |
| 500 | HRH2      | Histamine H2 receptor                                            | P25021     | 1      |
| 501 | EPHA1     | Ephrin type-A receptor 1                                         | P21709     | 1      |
| 502 | EPHB1     | Ephrin type-B receptor 1                                         | P54762     | 1      |
| 503 | EPHA3     | Ephrin type-A receptor 3                                         | P29320     | 1      |
| 504 | EPHB3     | Ephrin type-B receptor 3                                         | P54753     | 1      |
| 505 | EPHA7     | Ephrin type-A receptor 7                                         | Q15375     | 1      |
| 506 | EPHB2     | Ephrin type-B receptor 2                                         | P29323     | 1      |
| 507 | EPHA2     | Ephrin type-A receptor 2                                         | P29317     | 1      |
| 508 | ERAP2     | Endoplasmic reticulum aminopeptidase 2                           | Q6P179     | 1      |
| 509 | GRK6      | G protein-coupled receptor kinase 6                              | P43250     | 1      |
| 510 | RPA1      | Replication protein A 70 kDa DNA-binding subunit                 | P27694     | 1      |
| 511 | ADH1A     | Alcohol dehydrogenase 1A                                         | P07327     | 1      |
| 512 | ABAT      | 4-aminobutyrate aminotransferase, mitochondrial                  | P80404     | 1      |
| 513 | ABCC2     | Canalicular multispecific organic anion transporter 1            | Q92887     | 1      |
| 514 | MAP2K4    | Dual specificity mitogen-activated protein kinase kinase 4       | P45985     | 1      |
| 515 | PSMG1     | Proteasome assembly chaperone 1                                  | O95456     | 1      |
| 516 | ADCYAP1   | Pituitary adenylate cyclase-activating polypeptide               | P18509     | 1      |
| 517 | CASP1     | Caspase-1                                                        | P29466     | 1      |
| 518 | APOD      | Apolipoprotein D                                                 | P05090     | 1      |
| 519 | NOX5      | NADPH oxidase 5                                                  | Q96PH1     | 1      |
| 520 | NFATC1    | Nuclear factor of activated T-cells, cytoplasmic 1               | O95644     | 1      |
| 521 | CYCS      | Cytochrome c                                                     | P99999     | 1      |
| 522 | FOSL2     | Fos-related antigen 2                                            | P15408     | 1      |
| 523 | FOSL1     | Fos-related antigen 1                                            | P15407     | 1      |
| 524 | PRKCD     | Protein kinase C delta type                                      | Q05655     | 1      |
| 525 | TEP1      | Telomerase protein component 1                                   | Q99973     | 1      |
| 526 | FASLG     | Tumor necrosis factor ligand superfamily member 6                | P48023     | 1      |
| 527 | ADCY2     | Adenylate cyclase type 2                                         | Q08462     | 1      |
| 528 | TYR       | Tyrosinase                                                       | P14679     | 1      |
| 529 | MDM2      | E3 ubiquitin-protein ligase Mdm2                                 | Q00987     | 1      |
| 530 | HSD3B1    | 3 beta-hydroxysteroid dehydrogenase/Delta 5-->4-isomerase type 1 | P14060     | 1      |
| 531 | HSD3B2    | 3 beta-hydroxysteroid dehydrogenase/Delta 5-->4-isomerase type 2 | P26439     | 1      |
| 532 | ATP5F1B   | ATP synthase subunit beta, mitochondrial                         | P06576     | 1      |
| 533 | RXRΒ      | Retinoic acid receptor RXR-beta                                  | P28702     | 1      |



**Supplementary Table S3: The Drug-Disease targets**

| No. | Gene name | Protein names                                                      | UniProt ID | Degree |
|-----|-----------|--------------------------------------------------------------------|------------|--------|
| 534 | ADORA1    | Adenosine receptor A1                                              | P30542     | 1      |
| 535 | PDE5A     | cGMP-specific 3',5'-cyclic phosphodiesterase                       | O76074     | 1      |
| 536 | CD38      | ADP-ribosyl cyclase/cyclic ADP-ribose hydrolase 1                  | P28907     | 1      |
| 537 | RPS6KA3   | Ribosomal protein S6 kinase alpha-3                                | P51812     | 1      |
| 538 | XDH       | Xanthine dehydrogenase/oxidase [Includes: Xanthine dehydrogenase   | P47989     | 1      |
| 539 | CA2       | Carbonic anhydrase 2                                               | P00918     | 1      |
| 540 | NOX4      | NADPH oxidase 4                                                    | Q9NPH5     | 1      |
| 541 | CA4       | Carbonic anhydrase 4                                               | P22748     | 1      |
| 542 | CA7       | Carbonic anhydrase 7                                               | P43166     | 1      |
| 543 | AKR1B1    | Aldo-keto reductase family 1 member B1                             | P15121     | 1      |
| 544 | NMUR2     | Neuromedin-U receptor 2                                            | Q9GZQ4     | 1      |
| 545 | CES2      | Cocaine esterase                                                   | O00748     | 1      |
| 546 | ABCG2     | Broad substrate specificity ATP-binding cassette transporter ABCG2 | Q9UNQ0     | 1      |
| 547 | MERTK     | Tyrosine-protein kinase Mer                                        | Q12866     | 1      |
| 548 | PLA2G10   | Group 10 secretory phospholipase A2                                | O15496     | 1      |
| 549 | ELANE     | Neutrophil elastase                                                | P08246     | 1      |
| 550 | CES1      | Liver carboxylesterase 1                                           | P23141     | 1      |
| 551 | BCHE      | Cholinesterase                                                     | P06276     | 1      |
| 552 | TGM2      | Protein-glutamine gamma-glutamyltransferase 2                      | P21980     | 1      |
| 553 | PTPRC     | Receptor-type tyrosine-protein phosphatase C                       | P08575     | 1      |
| 554 | PDE7B     | cAMP-specific 3',5'-cyclic phosphodiesterase 7B                    | Q9NP56     | 1      |
| 555 | PDE4D     | cAMP-specific 3',5'-cyclic phosphodiesterase 4D                    | Q08499     | 1      |
| 556 | PDE4B     | cAMP-specific 3',5'-cyclic phosphodiesterase 4B                    | Q07343     | 1      |
| 557 | PDE7A     | High affinity cAMP-specific 3',5'-cyclic phosphodiesterase 7A      | Q13946     | 1      |
| 558 | MMP8      | Neutrophil collagenase                                             | P22894     | 1      |
| 559 | MMP13     | Collagenase 3                                                      | P45452     | 1      |
| 560 | CACNA1S   | Voltage-dependent L-type calcium channel subunit alpha-1S          | Q13698     | 1      |
| 561 | MMP10     | Stromelysin-2                                                      | P09238     | 1      |
| 562 | SLC29A1   | Equilibrative nucleoside transporter 1                             | Q99808     | 1      |
| 563 | IMPDH1    | Inosine-5'-monophosphate dehydrogenase 1                           | P20839     | 1      |
| 564 | CDK3      | Cyclin-dependent kinase 3                                          | Q00526     | 1      |
| 565 | ACVRL1    | Serine/threonine-protein kinase receptor R3                        | P37023     | 1      |
| 566 | MAP3K14   | Mitogen-activated protein kinase kinase kinase 14                  | Q99558     | 1      |
| 567 | PRF1      | Perforin-1                                                         | P14222     | 1      |
| 568 | F9        | Coagulation factor IX                                              | P00740     | 1      |
| 569 | ABCB11    | Bile salt export pump                                              | O95342     | 1      |
| 570 | CYP2C9    | Cytochrome P450 2C9                                                | P11712     | 1      |
| 571 | RHO       | Rhodopsin                                                          | P08100     | 1      |



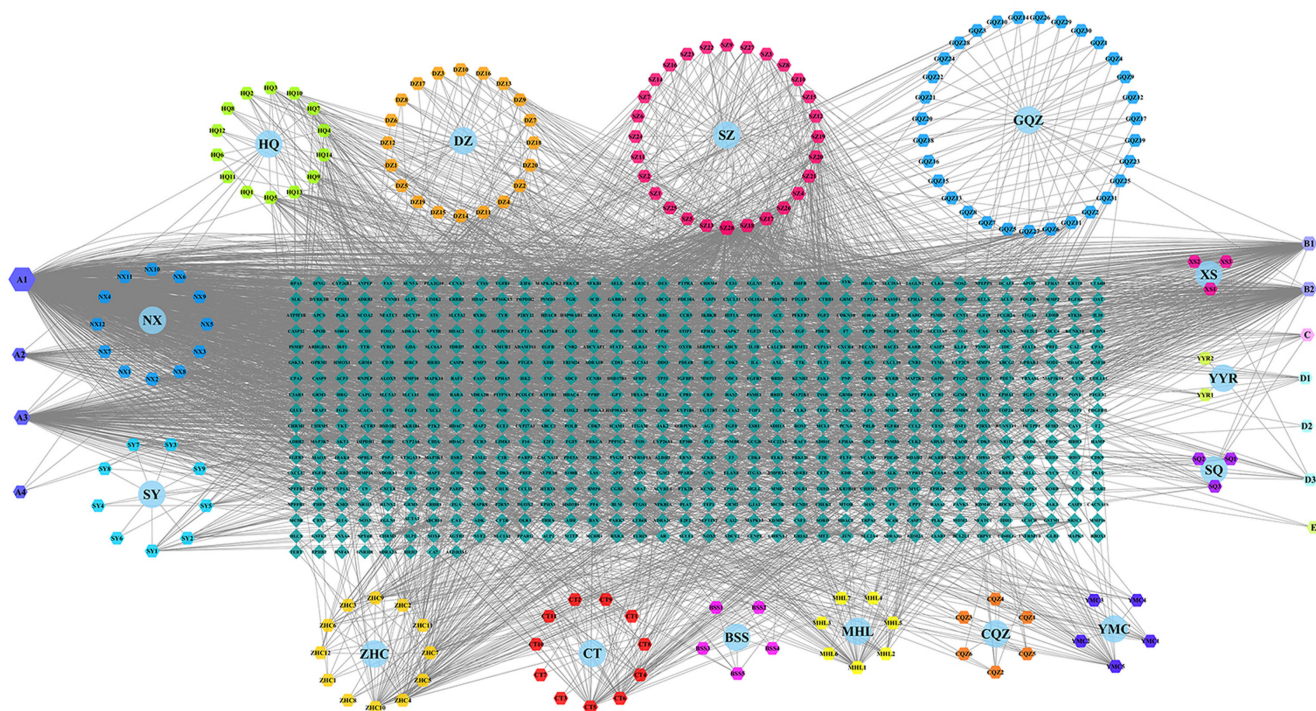

**Supplementary Figure 1. Herb-Compound-Targets network of potential targets in HZYS. The pink ellipse nodes represent the herbs in HZYS, and the hexagon represent the potential active ingredients in HZYS, and the green diamond nodes represent the corresponding targets of the ingredients. And the letters A1, A2, A3, A4, B1, B2, C, D1, D2, D3, E represent the common components of certain herbs. Detailed situations are shown in Table 1. (Unique letters represent different herbs: HQ: Astragalus mongholicus; DZ: Eucommia; SZ: Leech; GQZ: Barbary Wolfberry Fruit; XS: radix scrophulariae; YR: Coix Seed; SQ: pseudo ginseng; YMC: motherwort; CQZ: plantain seed; MHL: Eclipta prostrata; BSS: Glehnia littoralis; CT: periostracum cicada ; ZHC: human placenta; SY: Chinese yam; NX: Radix Achyranthis Bidentatae.)**

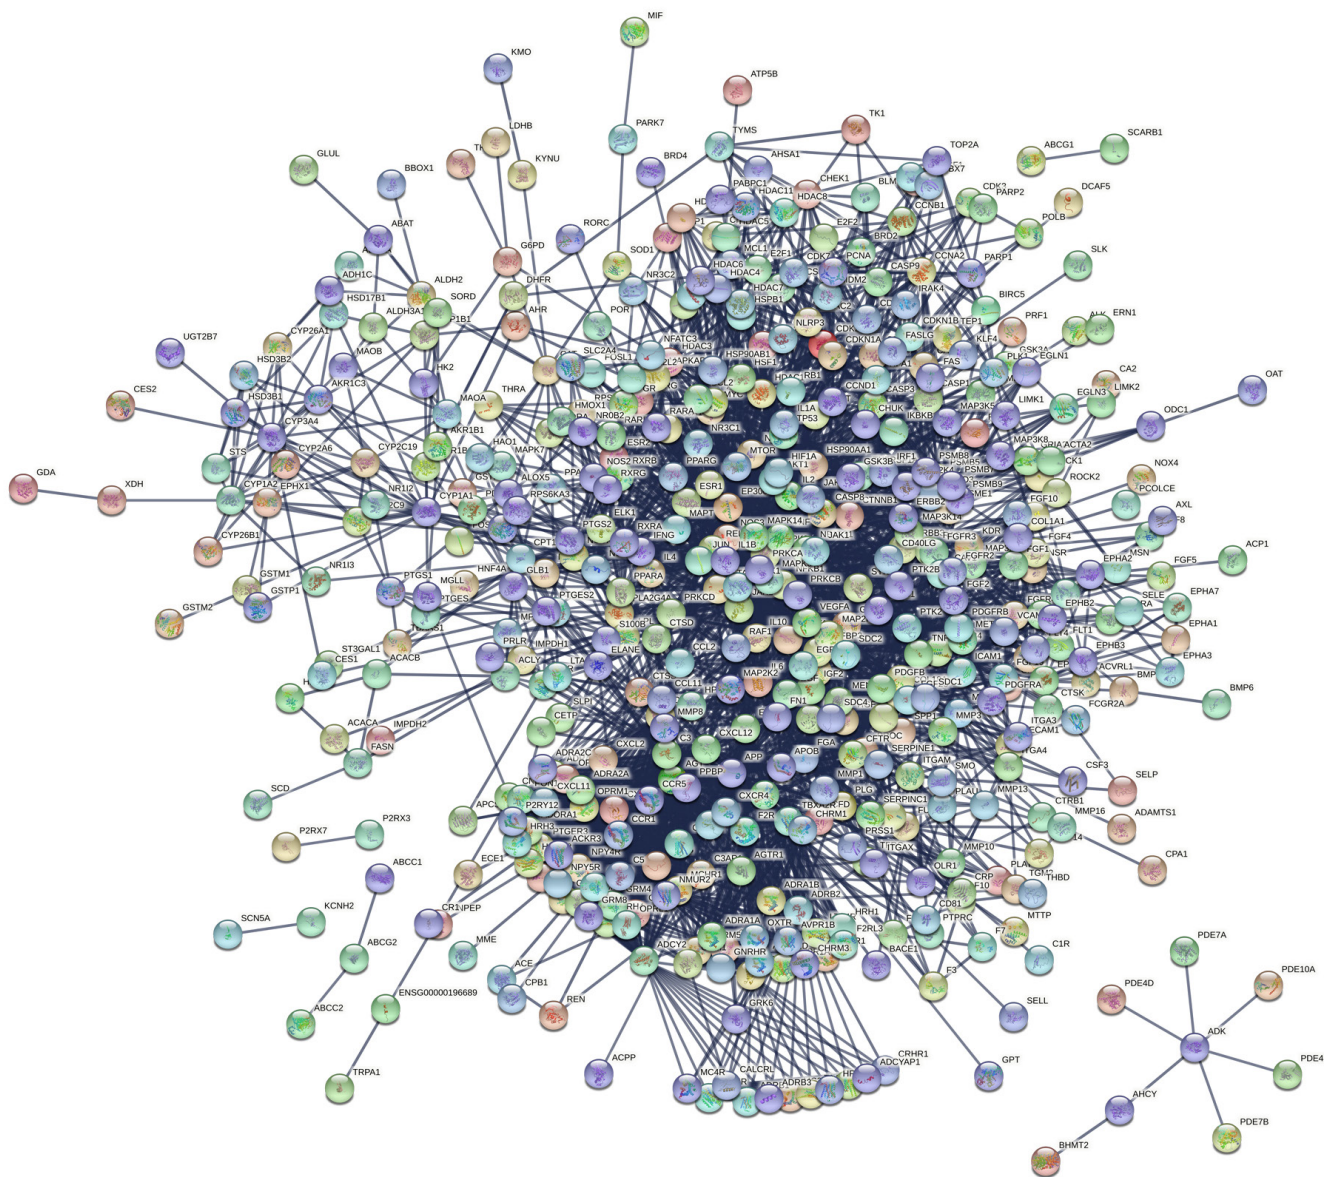

**Supplementary Figure 2.**
